# Supplementary material for: Salicylaldehyde-derived piperazine-functionalized hydrazone ligand-based Pt(ii) complexes: inhibition of EZH2-dependent tumorigenesis in pancreatic ductal adenocarcinoma, synergism with PARP inhibitors and enhanced apoptosis
Source: Royal Society of Chemistry journal article supplement (doi:10.1039/d4dt01243g), 2024-01-01
Supplement: d4dt01243g1.pdf [file d4dt01243g1.pdf]

## Supporting Information

*for*

### **Salicylaldehyde derived piperazine functionalized hydrazone ligand-based Pt(II) complexes: Inhibition of EZH2-dependent tumorigenesis in pancreatic ductal adenocarcinoma, synergism with PARP inhibitors and enhanced apoptosis**

Zhimin Lv<sup>a,#</sup>, Amjad Ali<sup>b,c,#</sup>, Cheng Zou<sup>a</sup>, Zerui Wang<sup>a</sup>, Minglu Ma<sup>a</sup>, Na Cheng<sup>a</sup>, Man Shad<sup>a,d</sup>, Huifang Hao,<sup>a,d</sup> Yongmin Zhang<sup>a,e,\*</sup> and Faiz-Ur Rahman<sup>a,\*</sup>

<sup>a</sup>Inner Mongolia University Research Center for Glycochemistry of Characteristic Medicinal Resources, Department of Chemistry and Chemical Engineering, Inner Mongolia University, Hohhot People's Republic of China

<sup>b</sup>Institute of Integrative Biosciences, CECOS University of IT and Emerging Sciences, Peshawar, KPK, Pakistan.

<sup>c</sup>Institute of Biomedical Sciences, School of Life Sciences, East China Normal University, 500 Dongchuan Road, Shanghai, 200241, People's Republic of China.

<sup>d</sup>School of Life Sciences, Inner Mongolia University, Hohhot 010021, People's Republic of China

<sup>e</sup>Sorbonne Université, CNRS, Institut Parisien de Chimie Moléculaire, UMR 8232, 4 Place Jussieu, 75005 Paris, France.

<sup>#</sup>These authors contributed equally to this work.

\*Corresponding Authors E-mail: Yongmin.zhang@upmc.fr (Y. Zhang), faiz@imu.edu.cn (F.-U. Rahman)

# $^1\text{H}$ and $^{13}\text{C}$ NMR spectra of all ligands

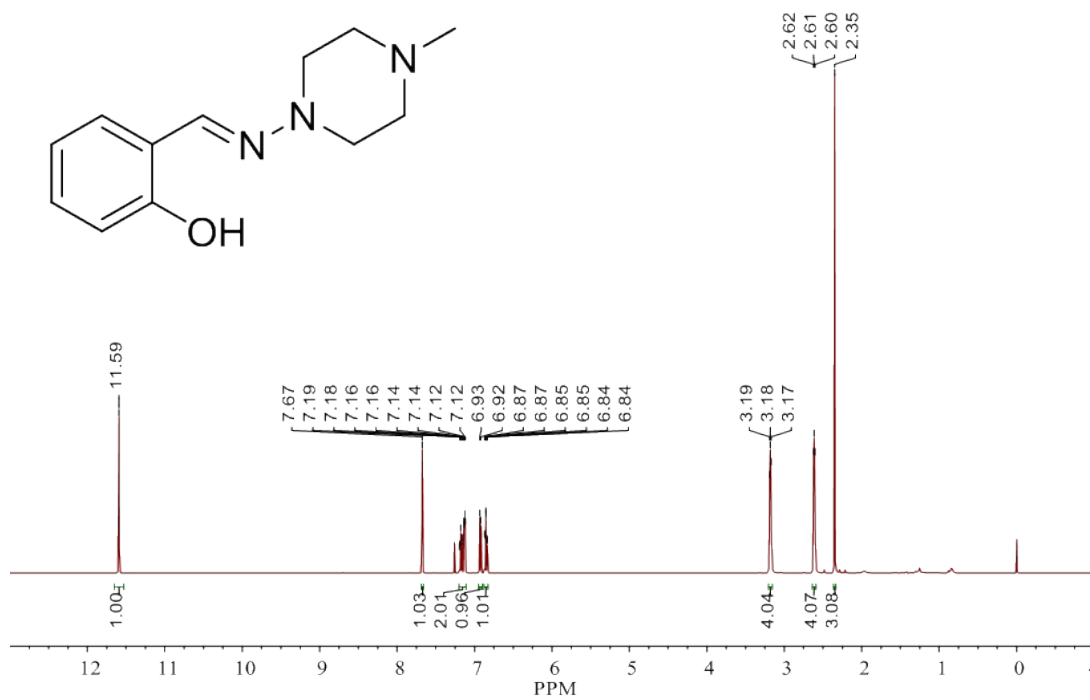

Fig. S1  $^1\text{H}$  NMR of L1 in  $\text{CDCl}_3$  at  $25^\circ\text{C}$

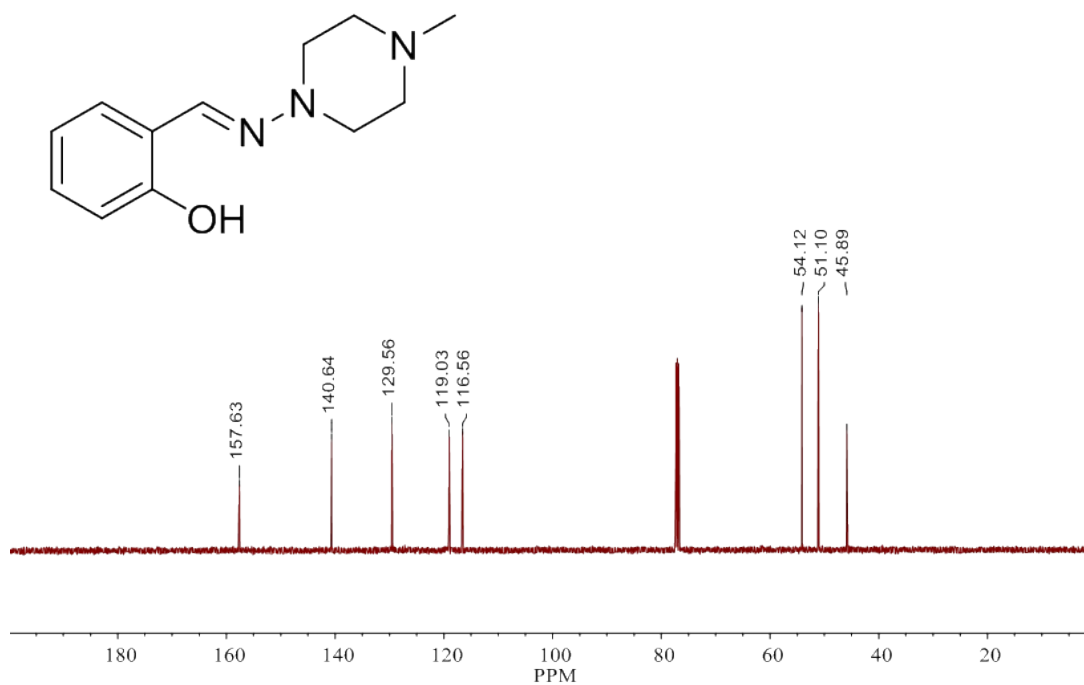

Fig. S2  $^{13}\text{C}$  NMR of L2 in  $\text{CDCl}_3$  at  $25^\circ\text{C}$

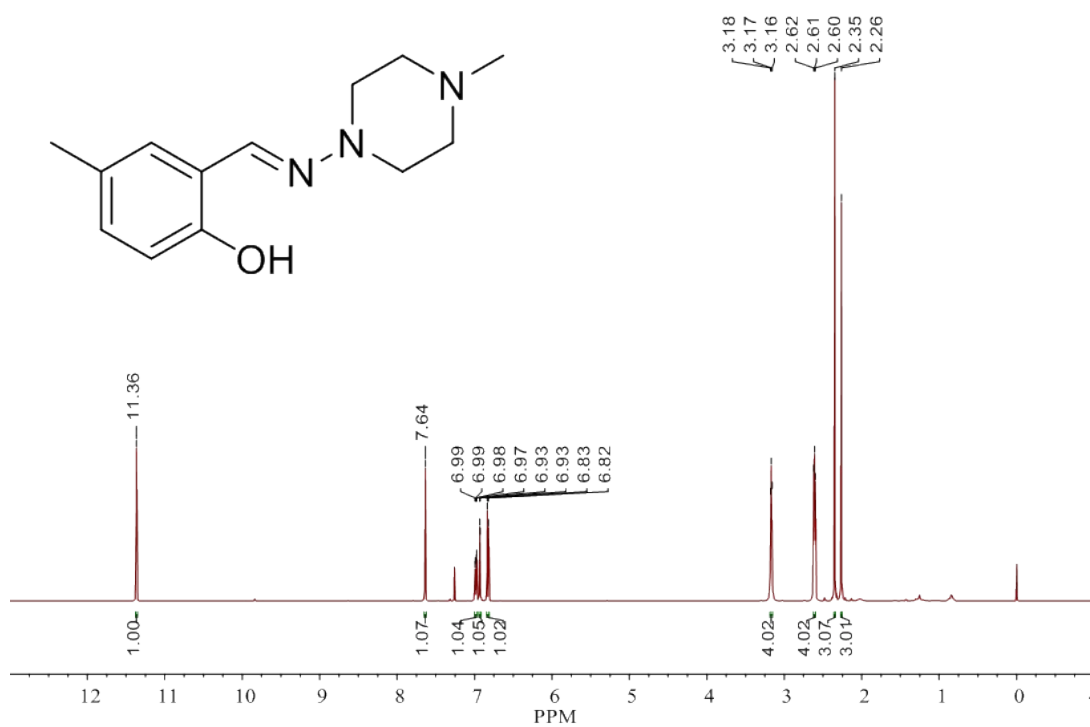

Fig. S3 <sup>1</sup>H NMR of L2 in CDCl<sub>3</sub> at 25°C

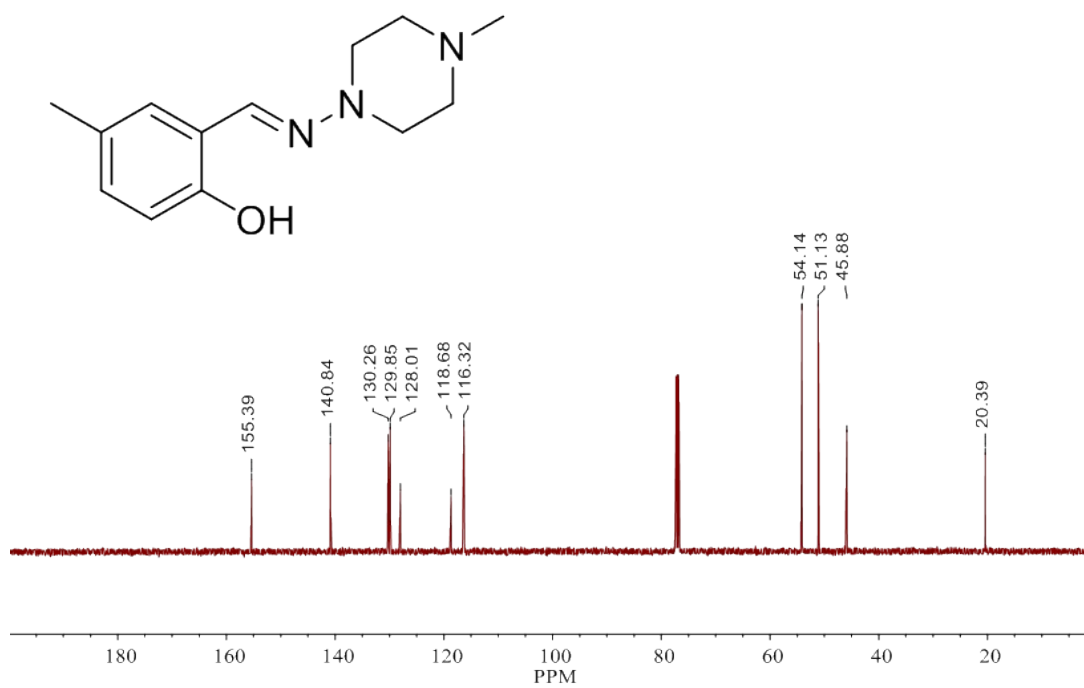

Fig. S4 <sup>13</sup>C NMR of L2 in CDCl<sub>3</sub> at 25°C

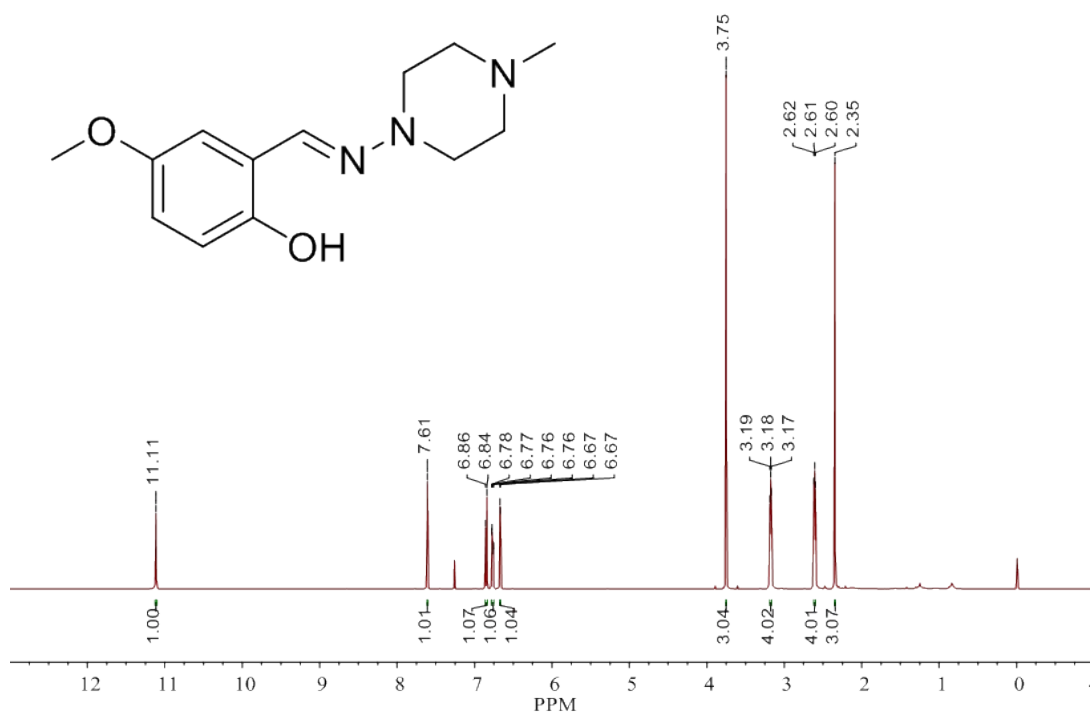

Fig. S5 <sup>1</sup>H NMR of L3 in CDCl<sub>3</sub> at 25°C

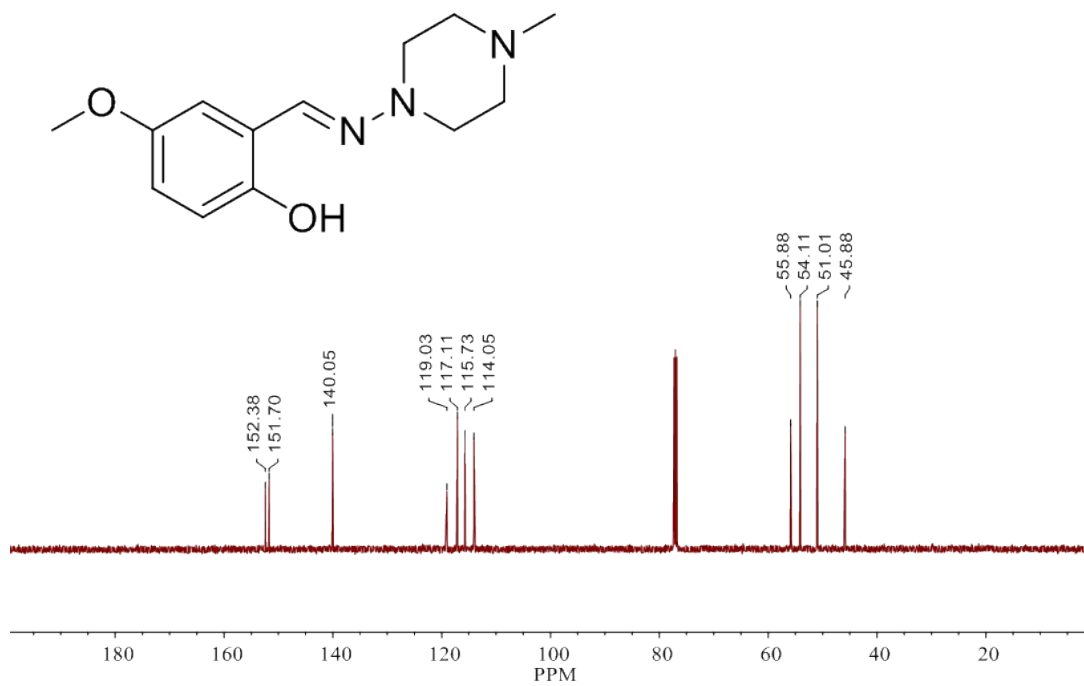

Fig. S6 <sup>13</sup>C NMR of L3 in CDCl<sub>3</sub> at 25°C

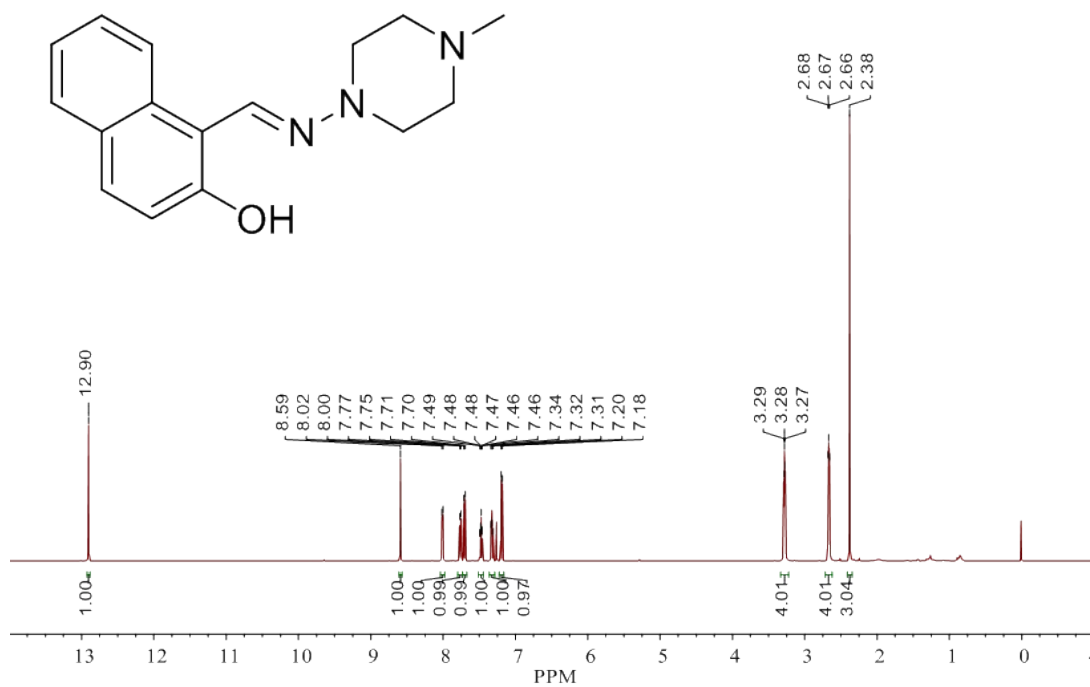

Fig. S7 <sup>1</sup>H NMR of L4 in CDCl<sub>3</sub> at 25°C

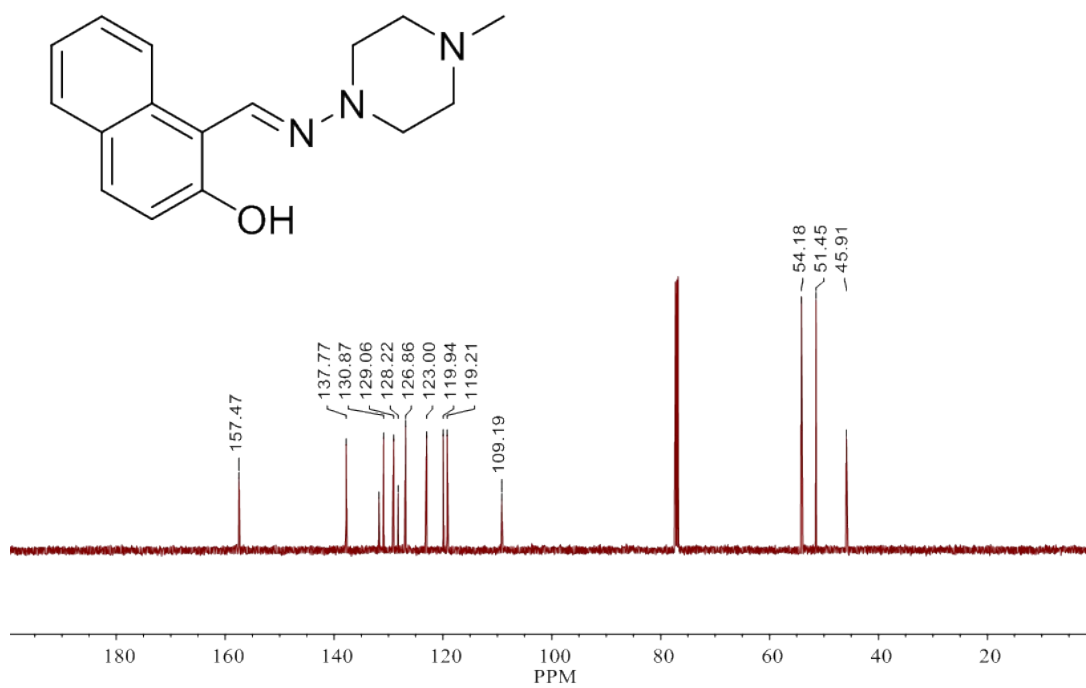

Fig. S8 <sup>13</sup>C NMR of L4 in CDCl<sub>3</sub> at 25°C

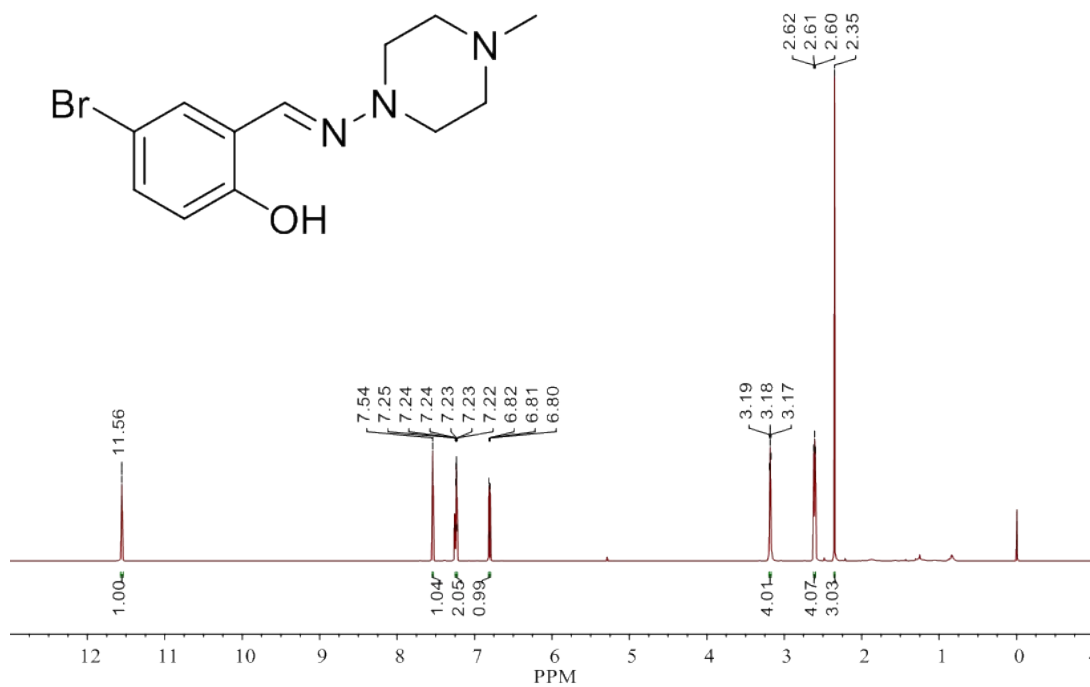

Fig. S9 <sup>1</sup>H NMR of L5 in CDCl<sub>3</sub> at 25°C

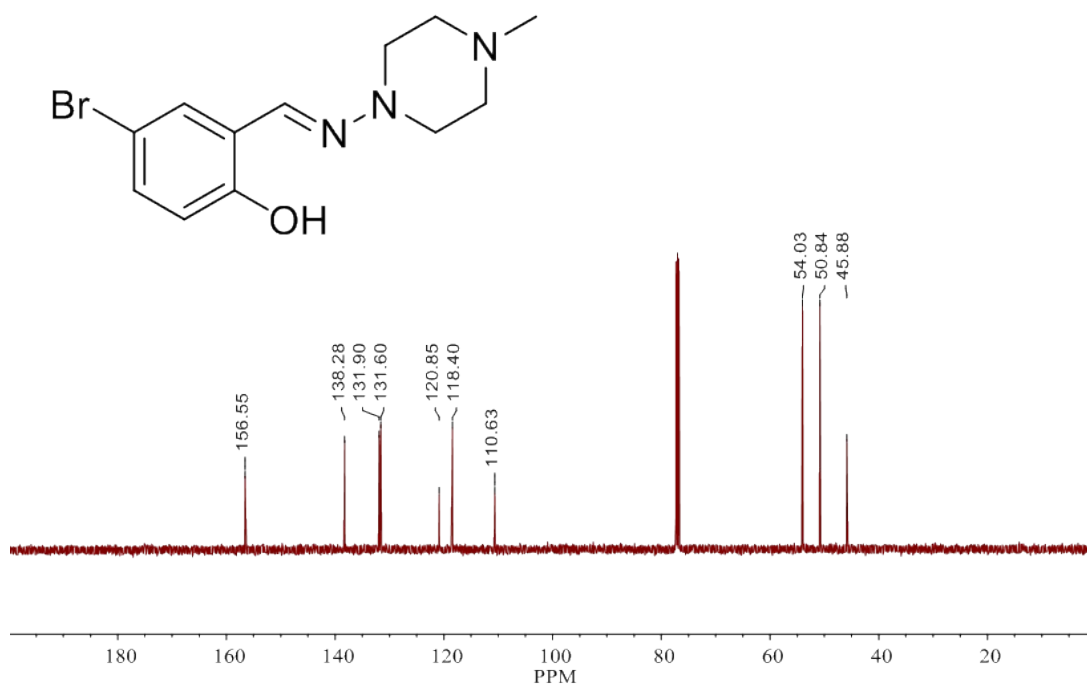

Fig. S10 <sup>13</sup>C NMR of L5 in CDCl<sub>3</sub> at 25°C

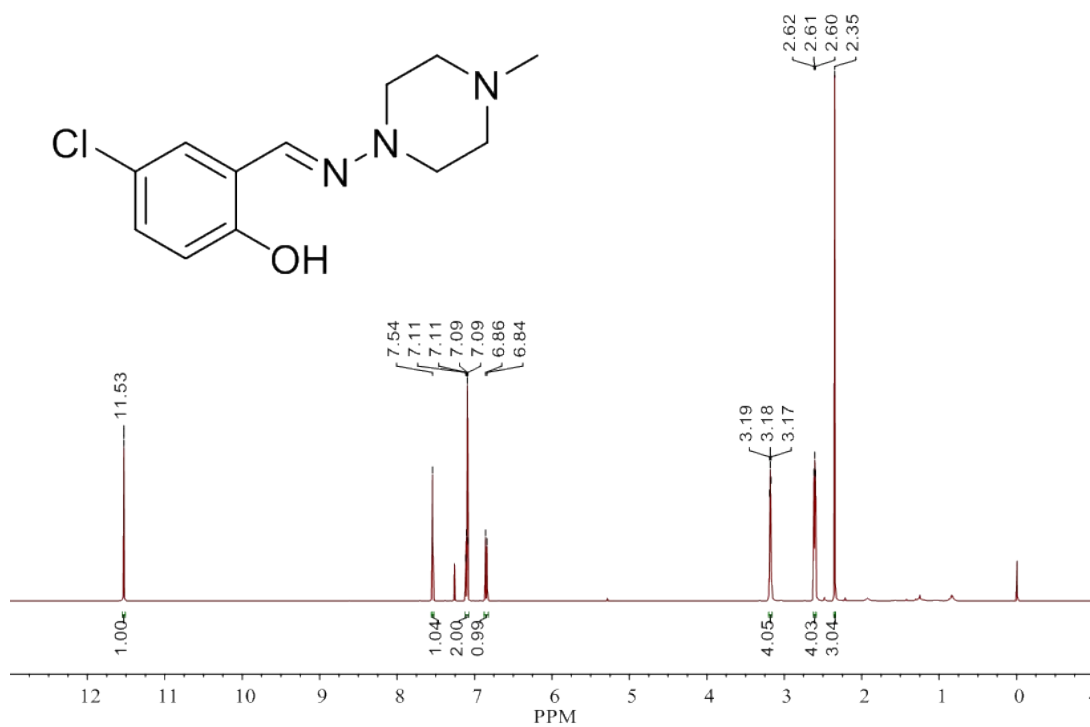

Fig. S11 <sup>1</sup>H NMR of L6 in CDCl<sub>3</sub> at 25°C

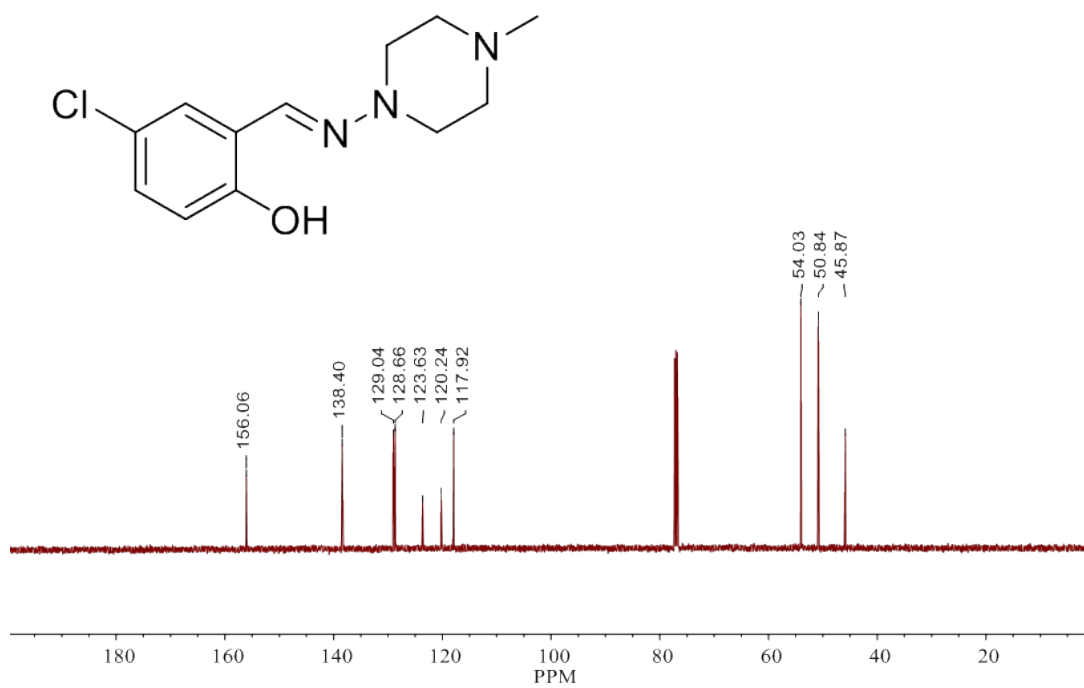

Fig. S12 <sup>13</sup>C NMR of L6 in CDCl<sub>3</sub> at 25°C

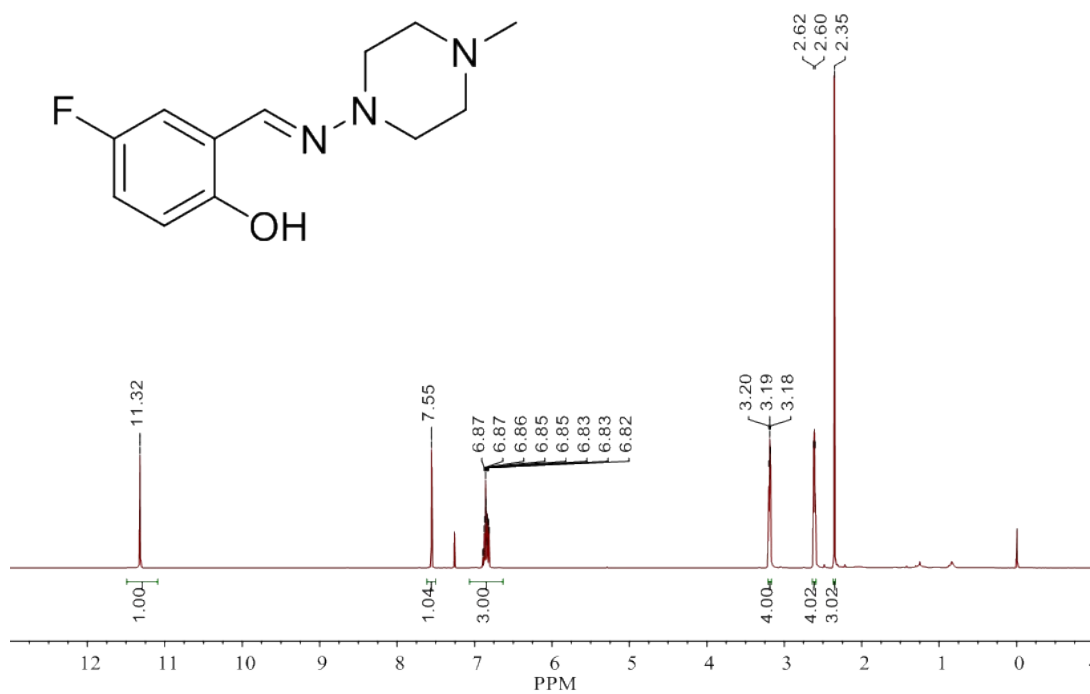

Fig. S13 <sup>1</sup>H NMR of L7 in CDCl<sub>3</sub> at 25°C

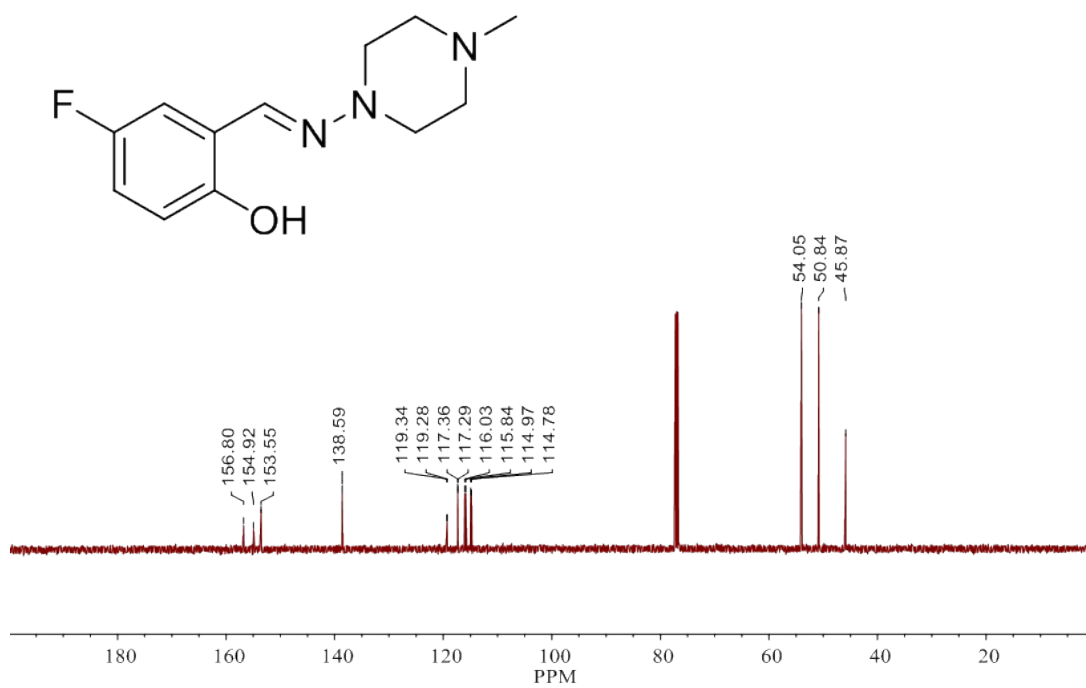

Fig. S14 <sup>13</sup>C NMR of L7 in CDCl<sub>3</sub> at 25°C



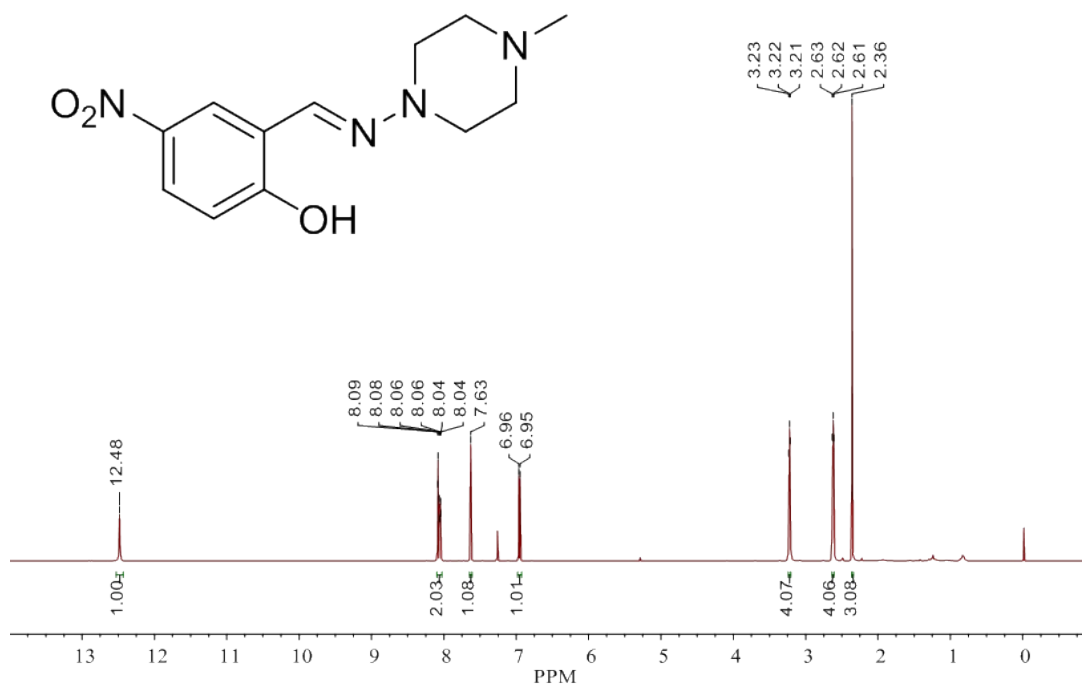

Fig. S15 <sup>1</sup>H NMR of L8 in CDCl<sub>3</sub> at 25°C

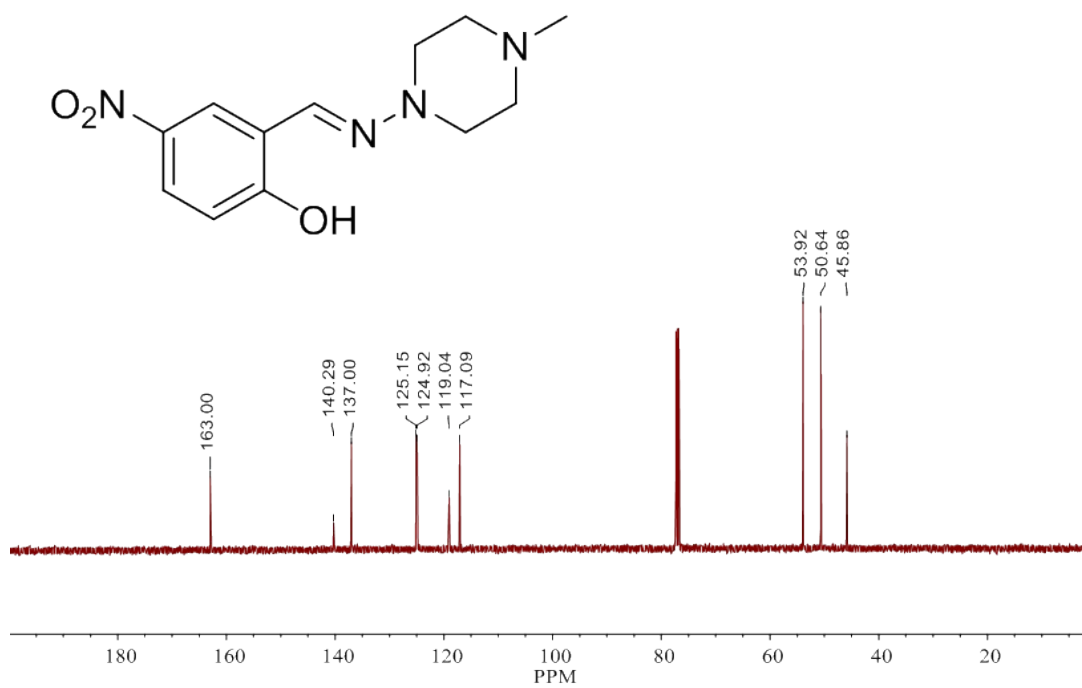

Fig. S16 <sup>13</sup>C NMR of L8 in CDCl<sub>3</sub> at 25°C

# $^1\text{H}$ and $^{13}\text{C}$ NMR spectra of platinum complexes (C1-C8)

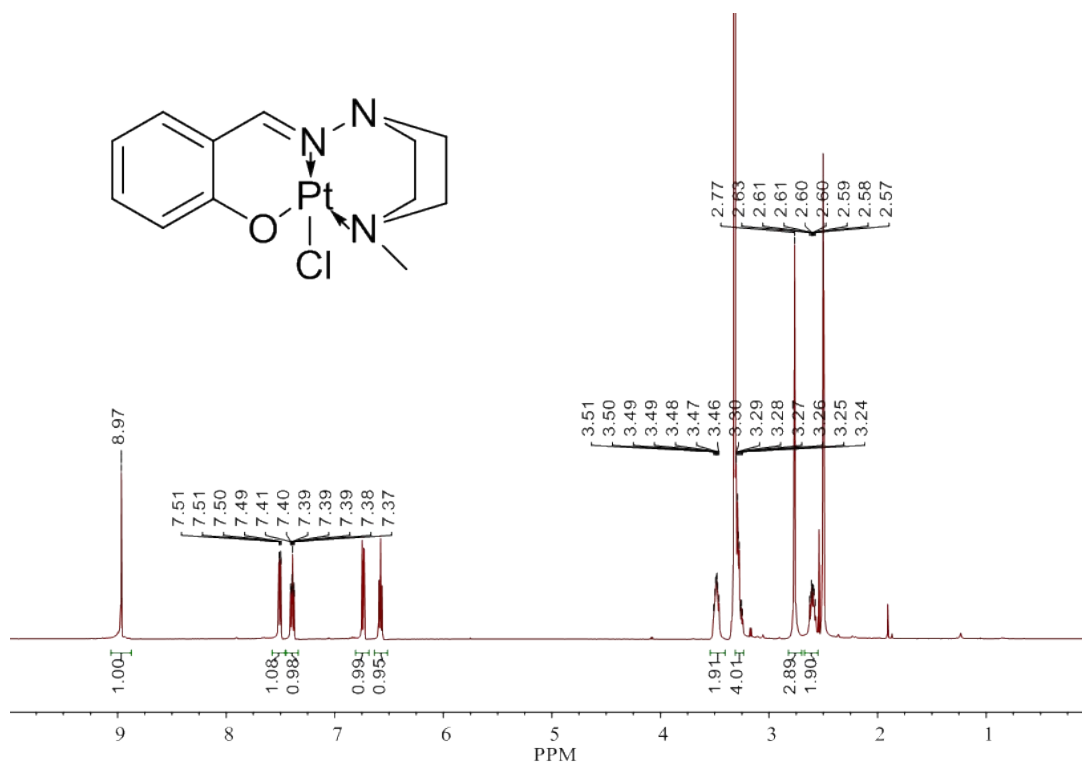

Fig. S17  $^1\text{H}$  NMR of C1 in DMSO- $d_6$  at 25°C

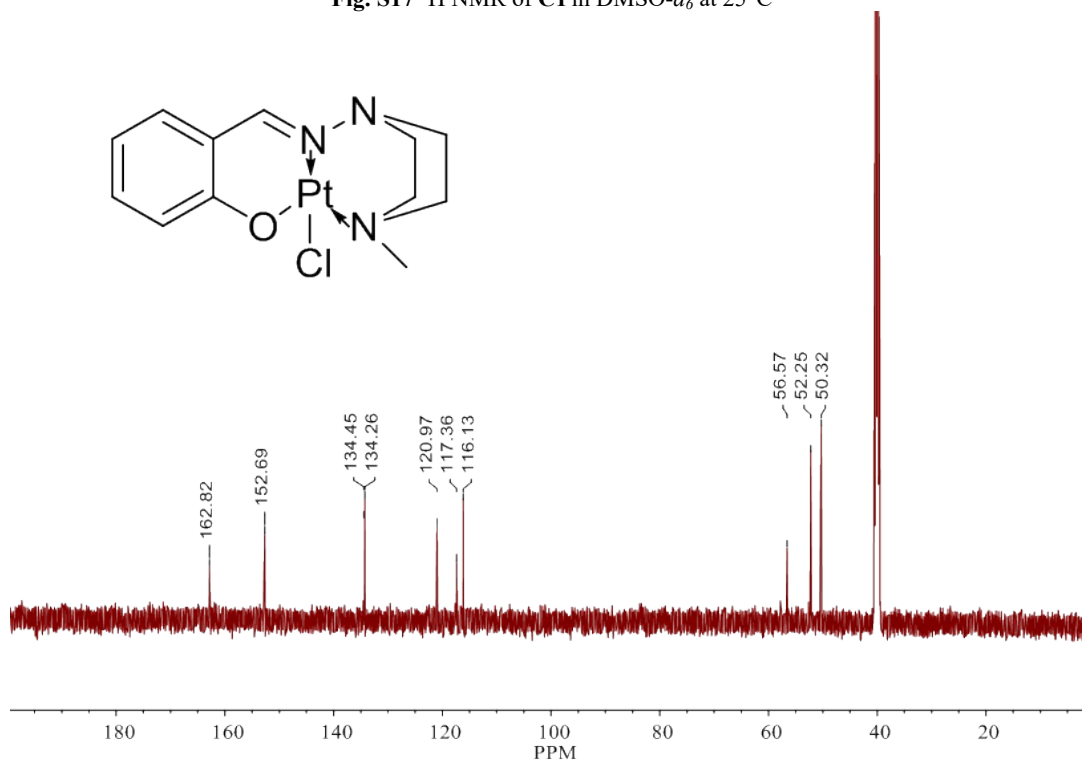

Fig. S18  $^{13}\text{C}$  NMR of C1 in DMSO- $d_6$  at 25°C

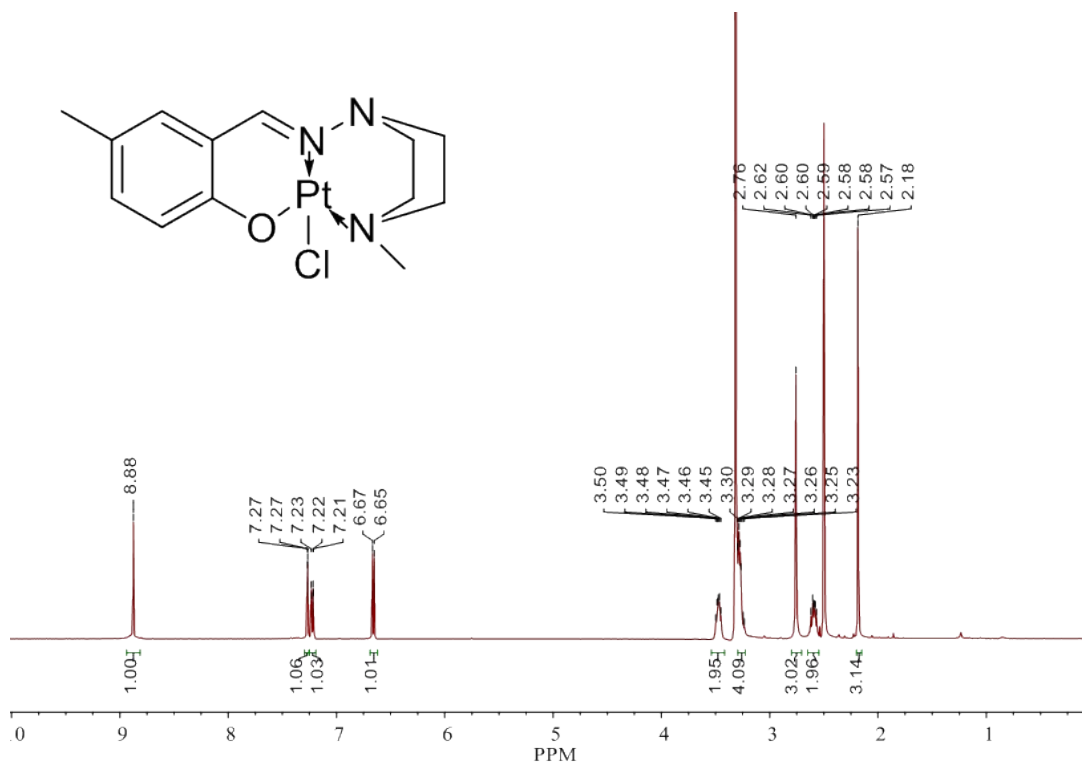

Fig. S19 <sup>1</sup>H NMR of C2 in DMSO-*d*<sub>6</sub> at 25°C

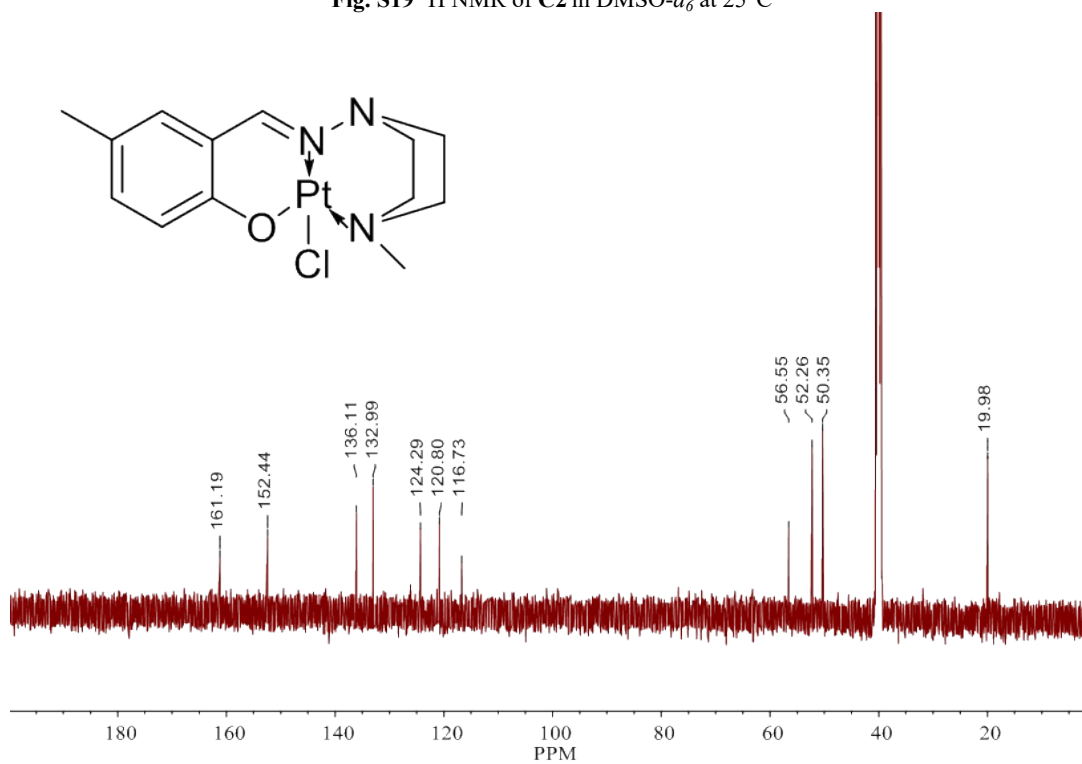

Fig. S20 <sup>13</sup>C NMR of C2 in DMSO-*d*<sub>6</sub> at 25°C

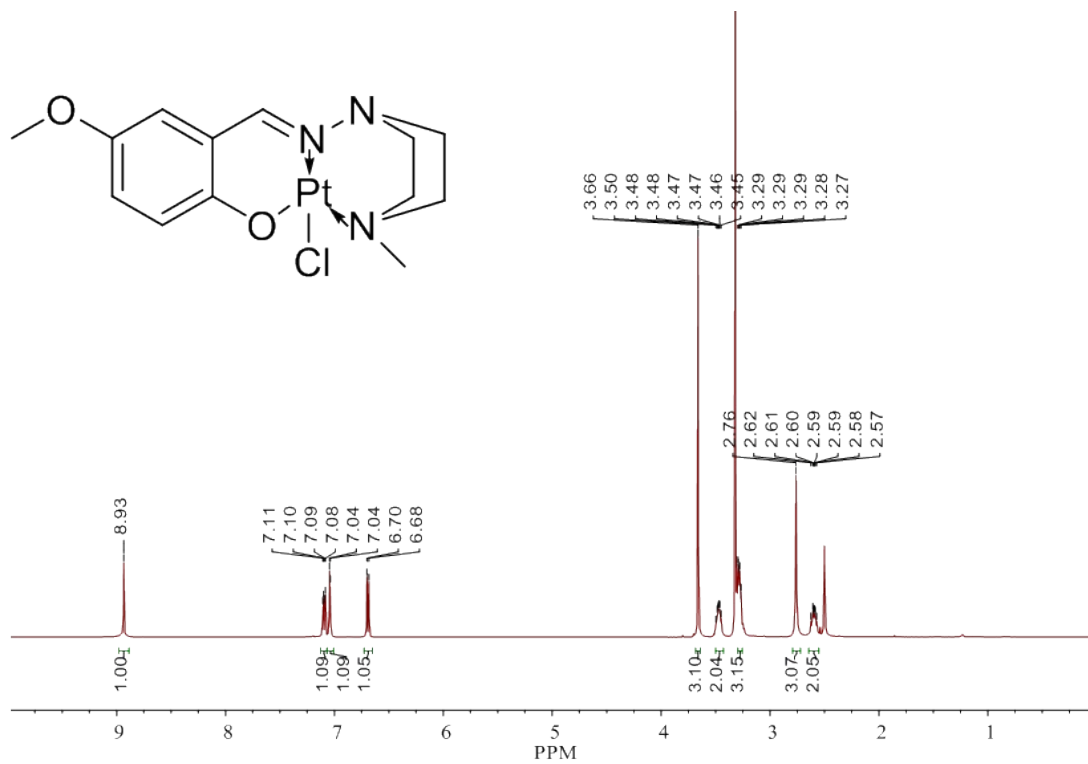

Fig. S21 <sup>1</sup>H NMR of C3 in DMSO-*d*<sub>6</sub> at 25°C

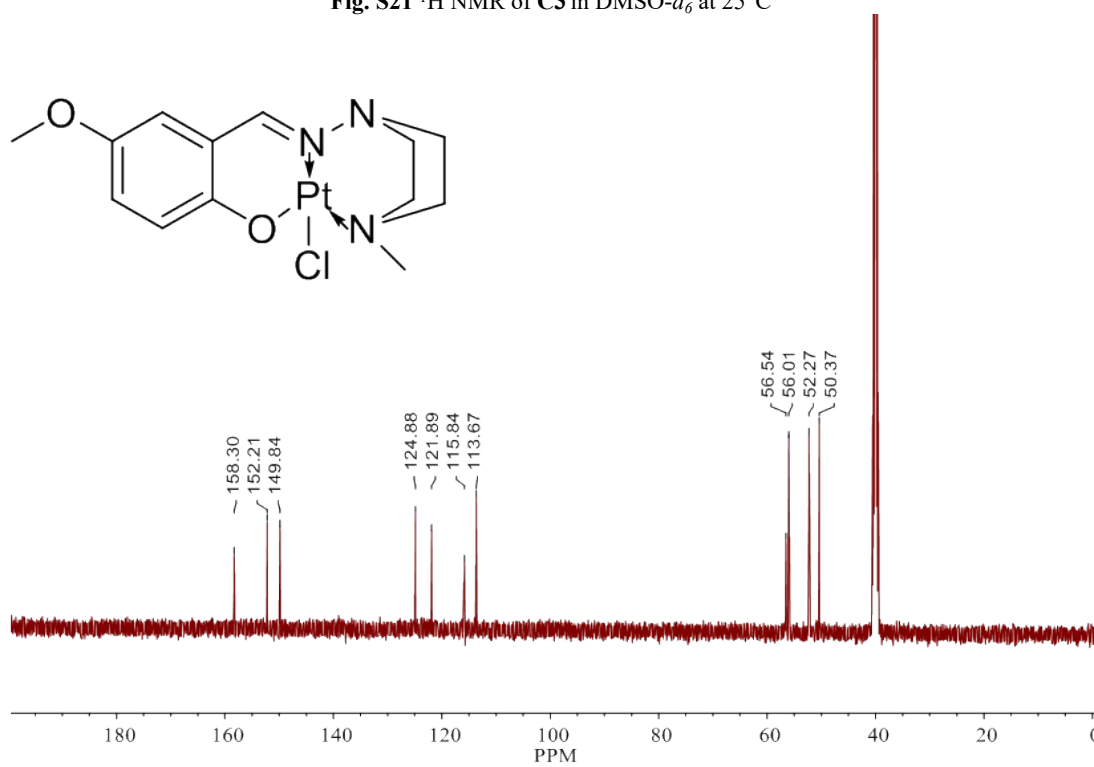

Fig. S22  $^{13}\text{C}$  NMR of C3 in  $\text{DMSO-}d_6$  at  $25^\circ\text{C}$

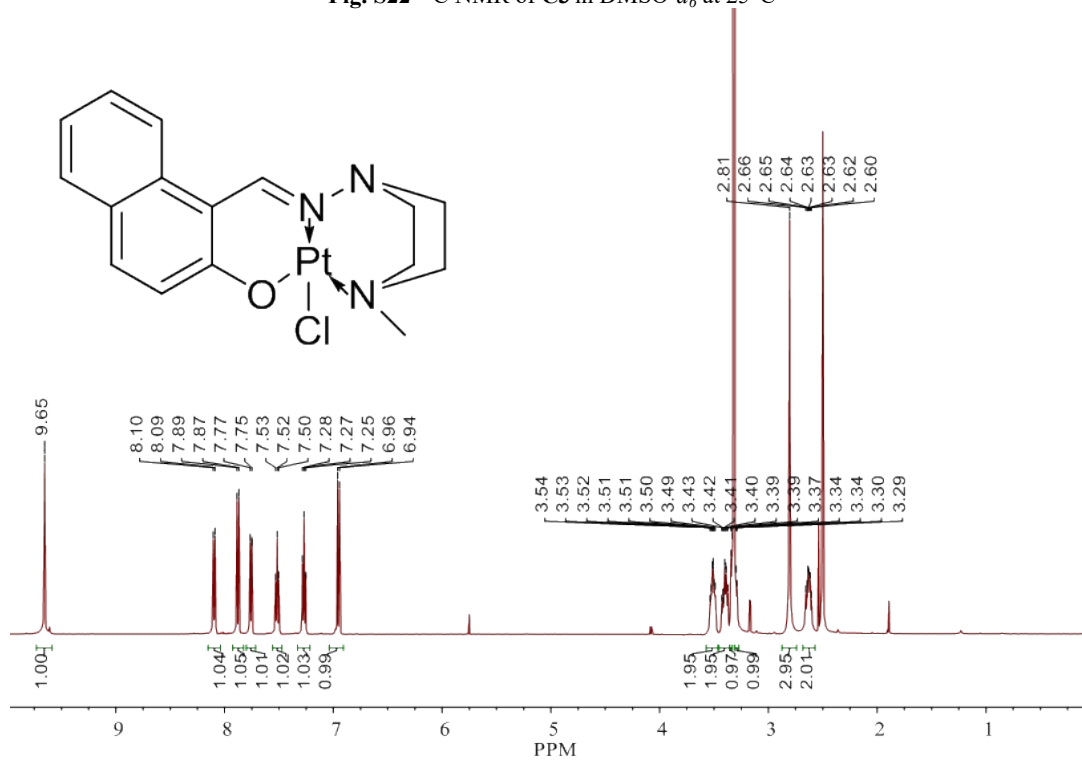

Fig. S23  $^1\text{H}$  NMR of C4 in  $\text{DMSO-}d_6$  at  $25^\circ\text{C}$

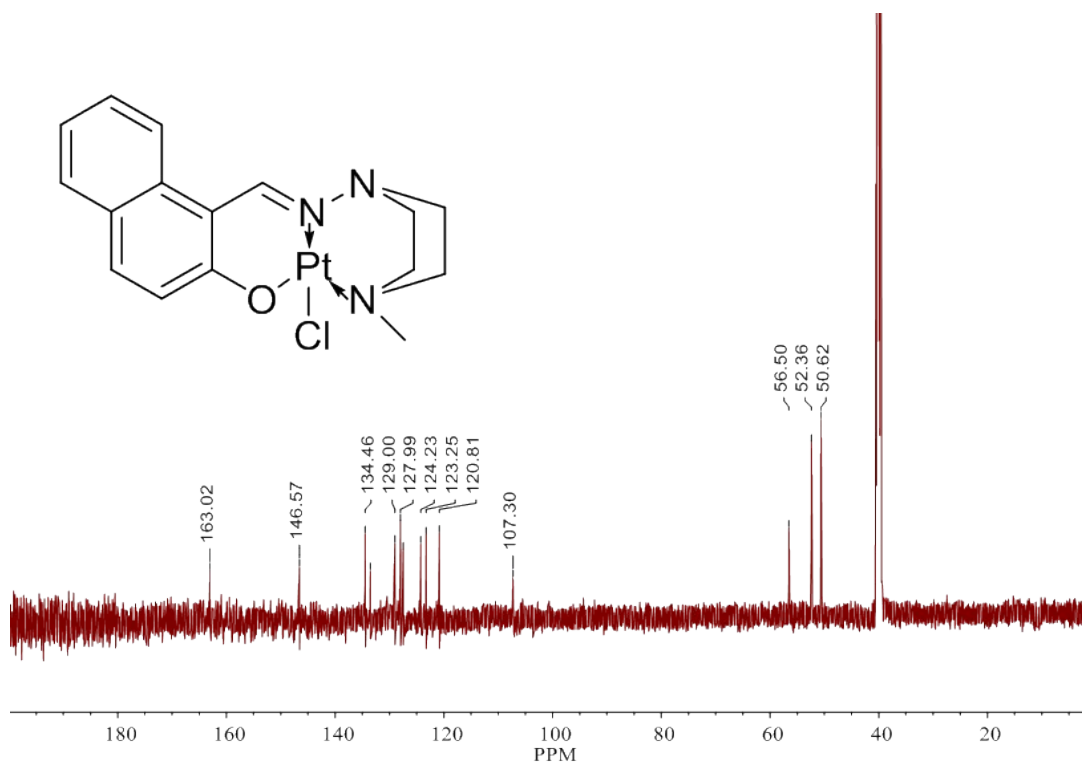

Fig. S24  $^{13}\text{C}$  NMR of C4 in  $\text{DMSO-}d_6$  at  $25^\circ\text{C}$

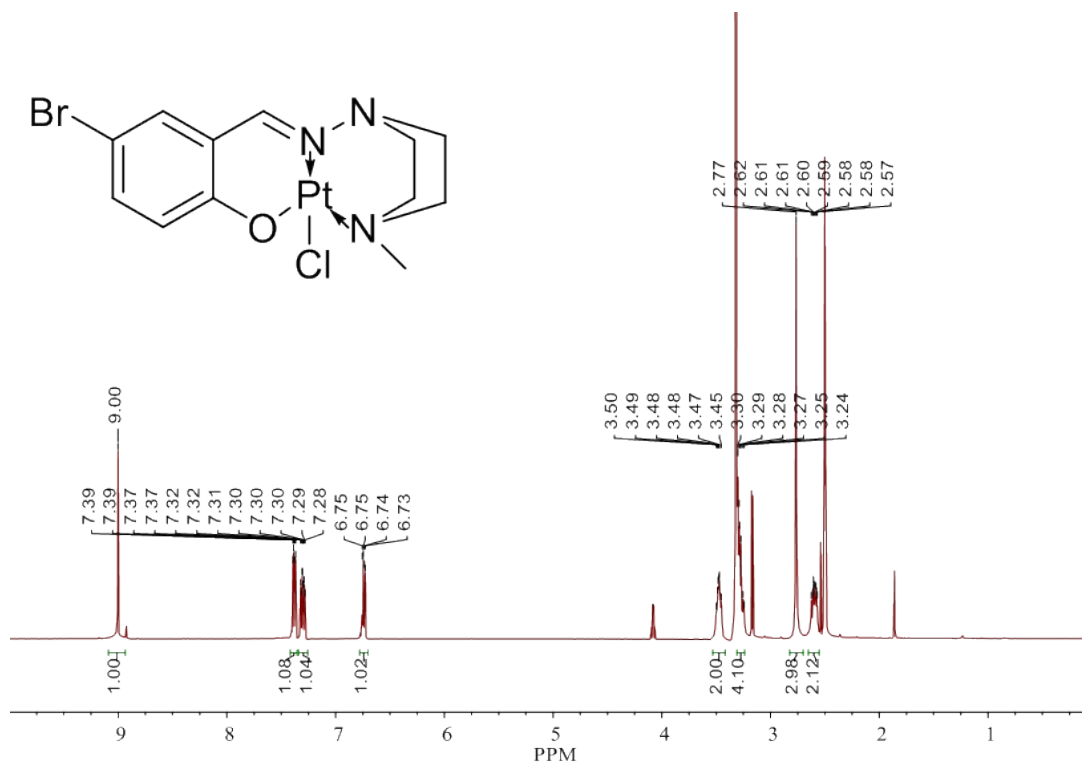

Fig. S25 <sup>1</sup>H NMR of C5 in DMSO-*d*<sub>6</sub> at 25°C

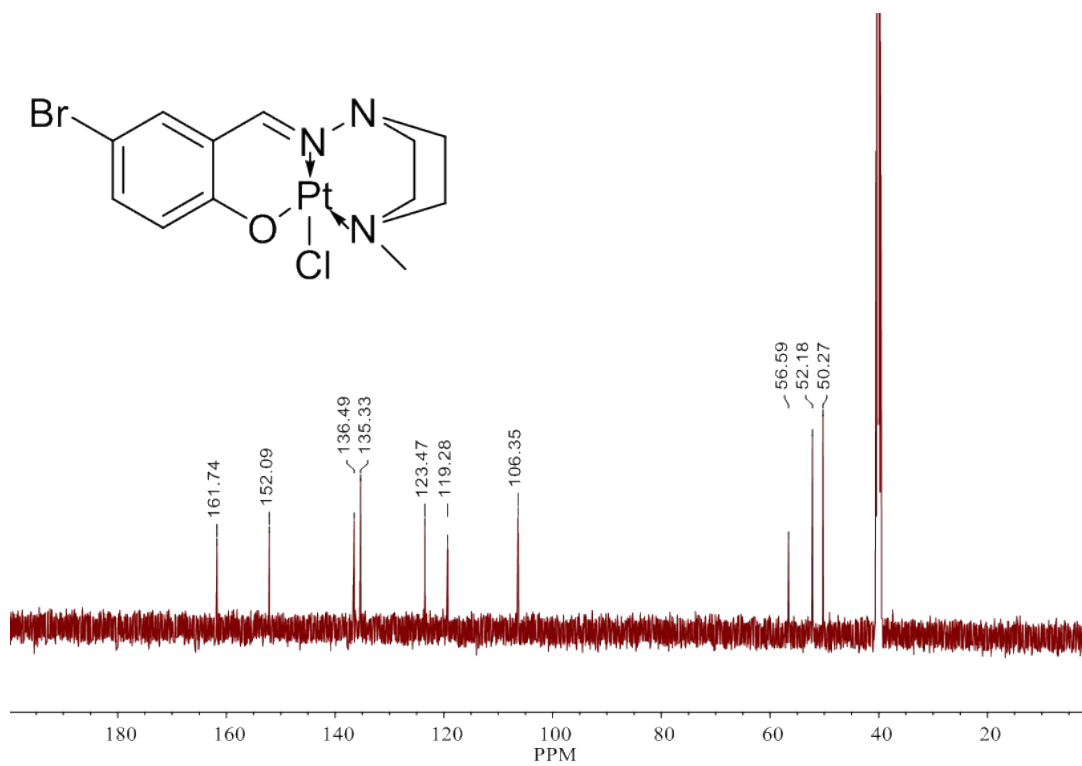

Fig. S26 <sup>13</sup>C NMR of C5 in DMSO-*d*<sub>6</sub> at 25°C

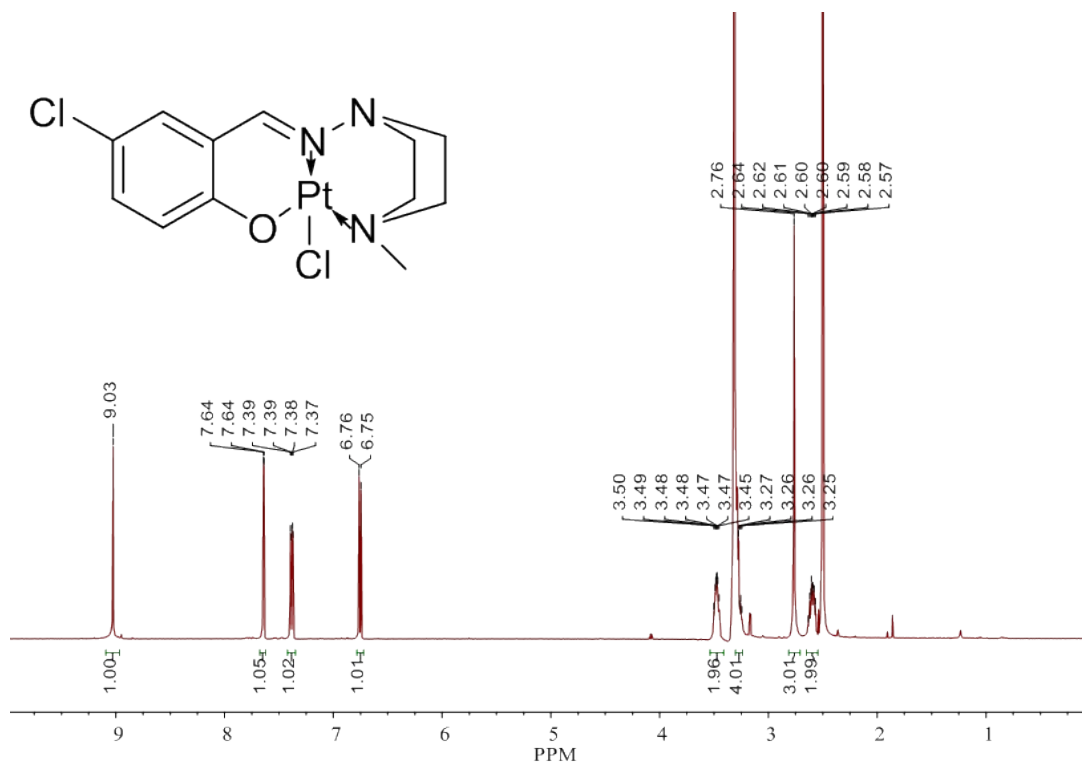

Fig. S27  $^1\text{H}$  NMR of C6 in DMSO- $d_6$  at 25°C

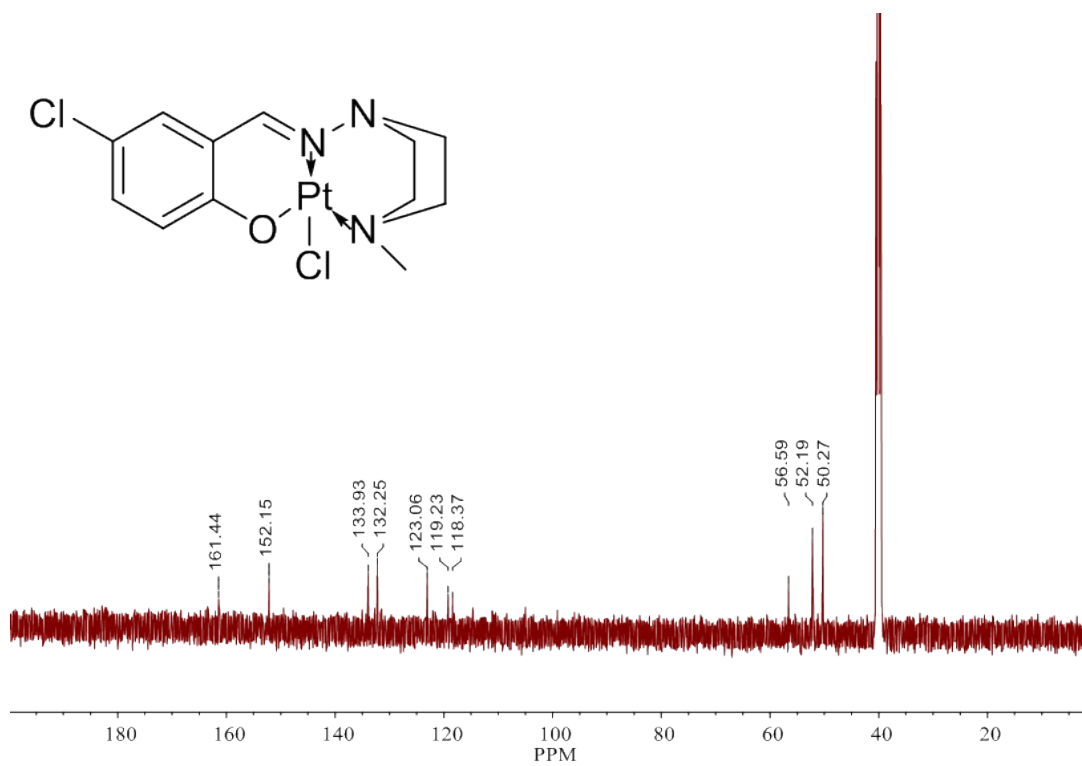

Fig. S28  $^{13}\text{C}$  NMR of C6 in DMSO- $d_6$  at 25°C

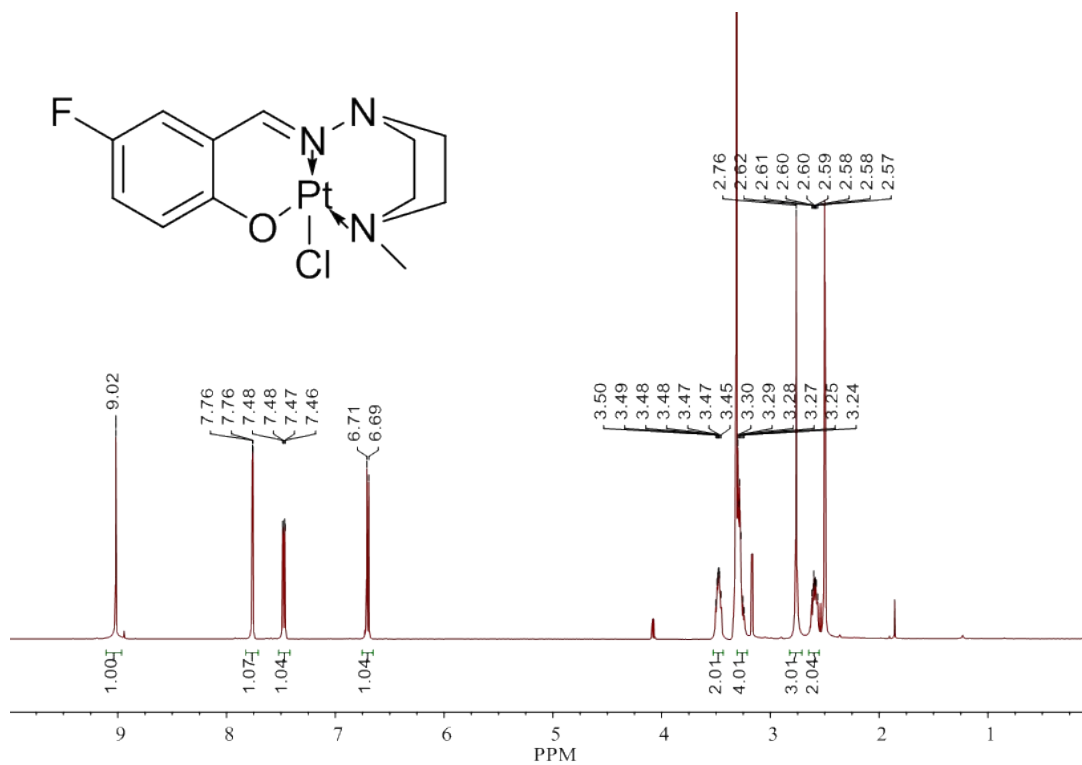

Fig. S29 <sup>1</sup>H NMR of C7 in DMSO-*d*<sub>6</sub> at 25°C

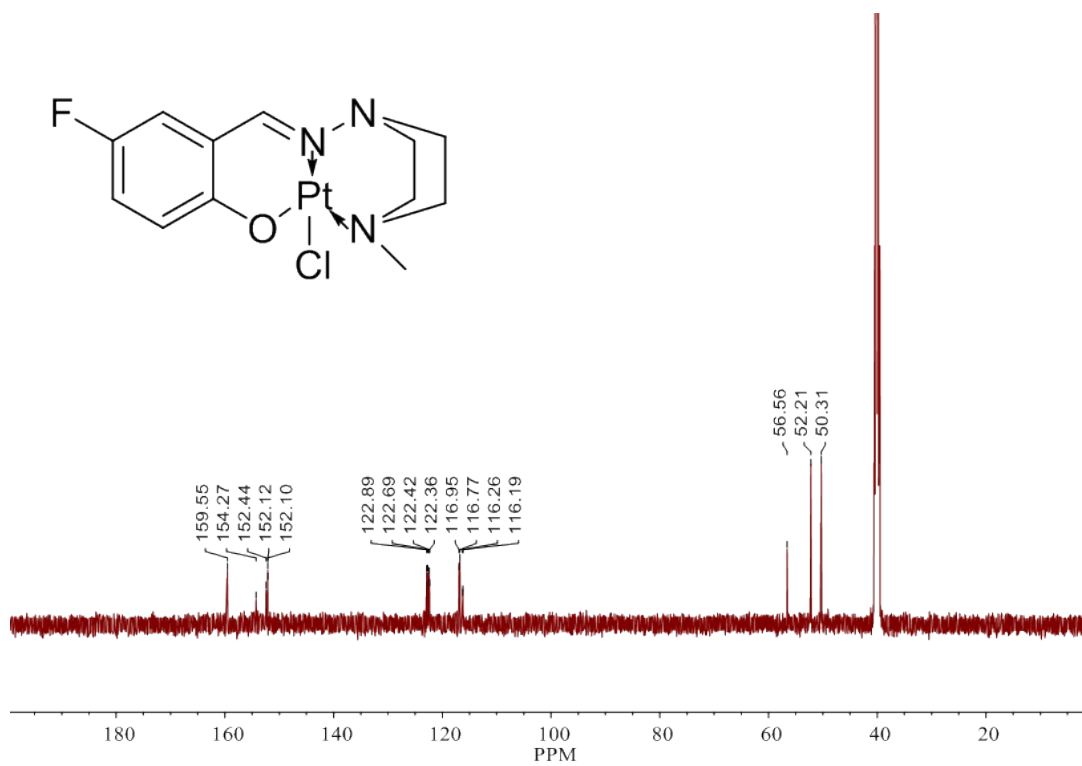

Fig. S30 <sup>13</sup>C NMR of C7 in DMSO-*d*<sub>6</sub> at 25°C



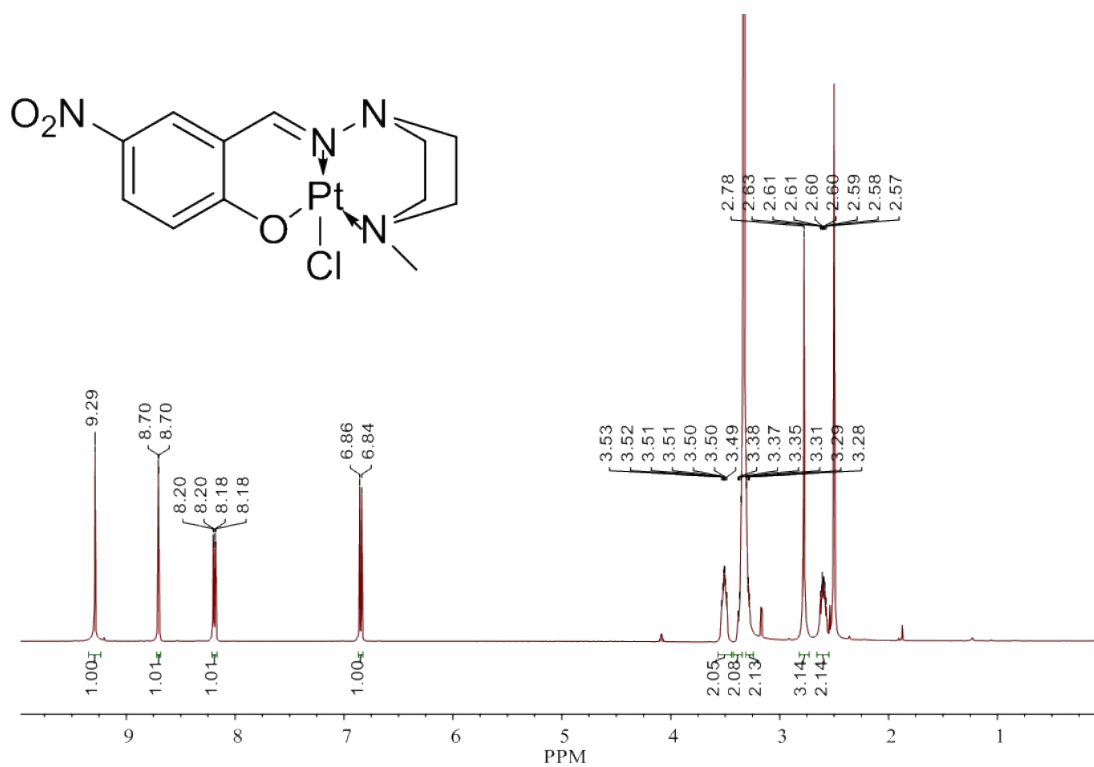

Fig. S31 <sup>1</sup>H NMR of C8 in DMSO-*d*<sub>6</sub> at 25°C

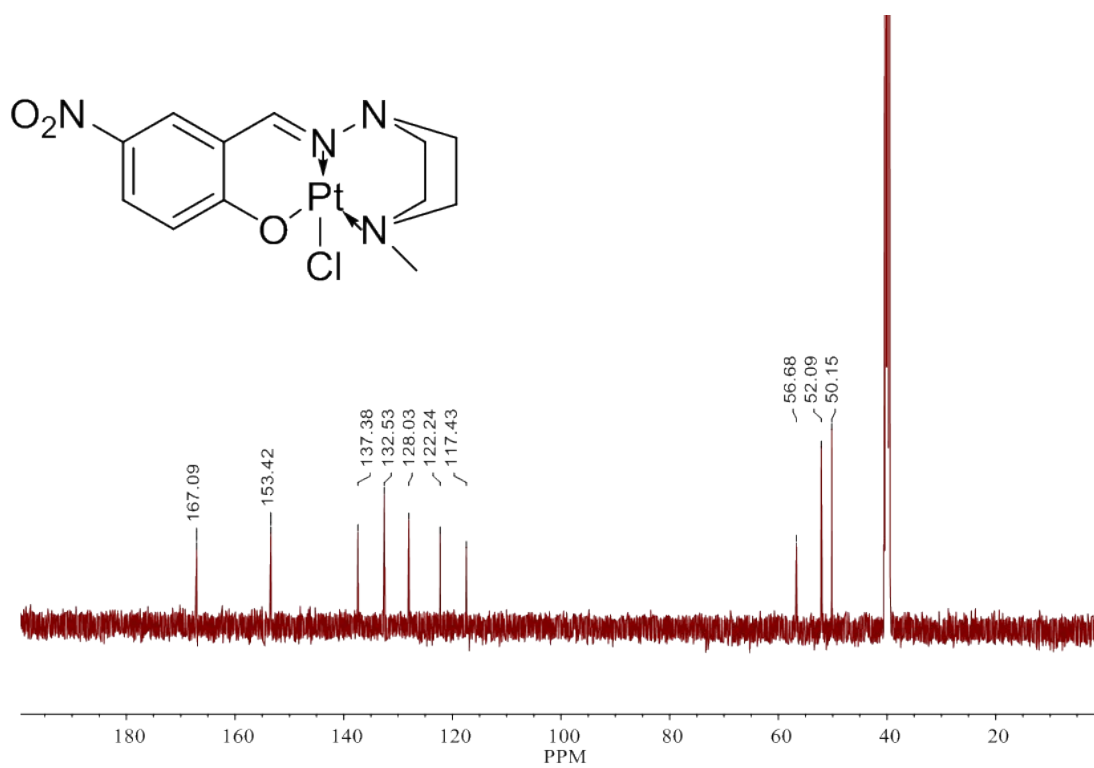

Fig. S32 <sup>13</sup>C NMR of C8 in DMSO-*d*<sub>6</sub> at 25°C

## Mass spectra of all ligands (L1-L8)

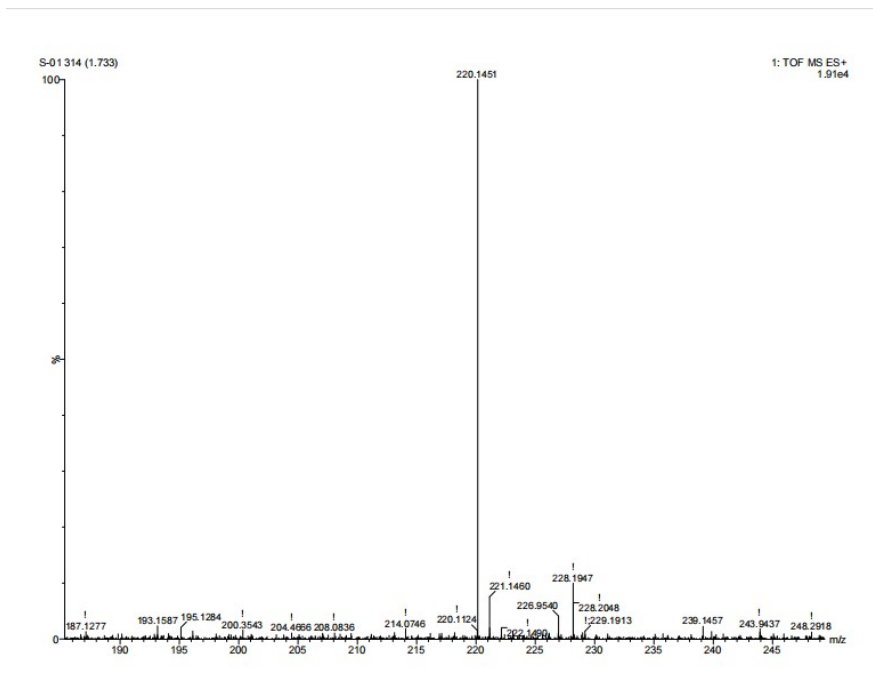

Fig. S33 Mass Spectrum of L1

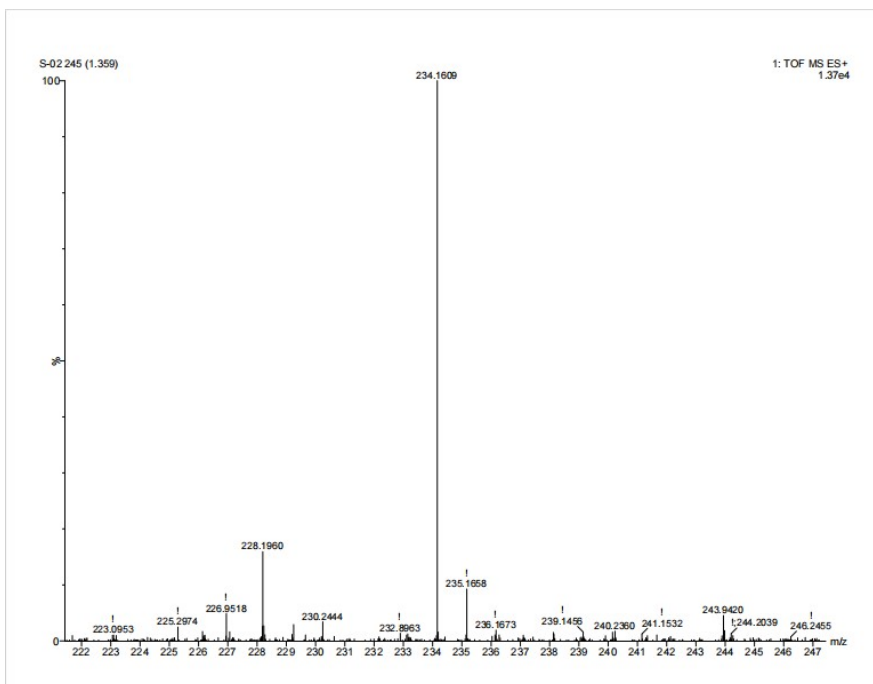

Fig. S34 Mass Spectrum of L2

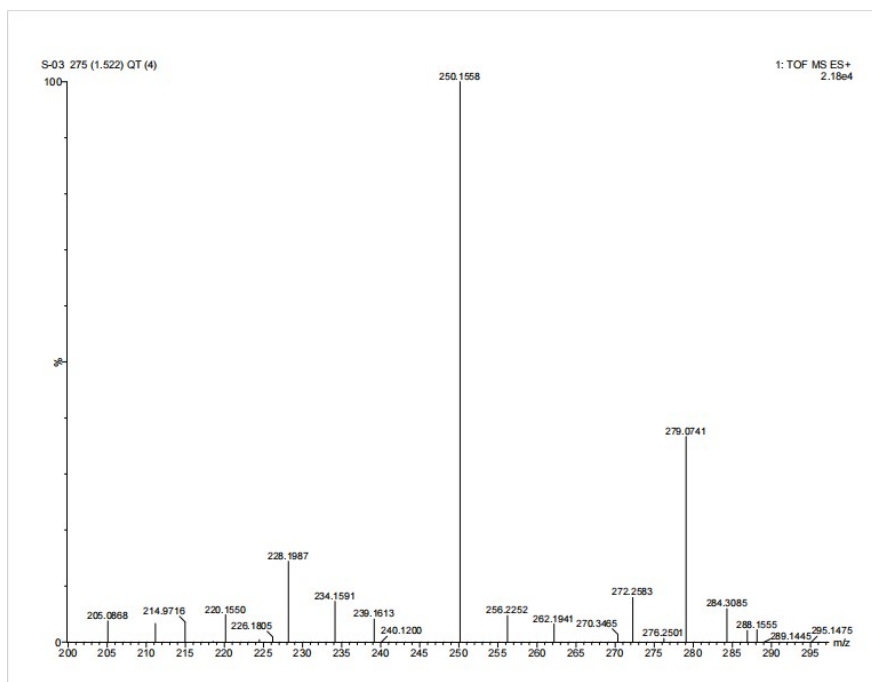

Fig. S35 Mass Spectrum of L3

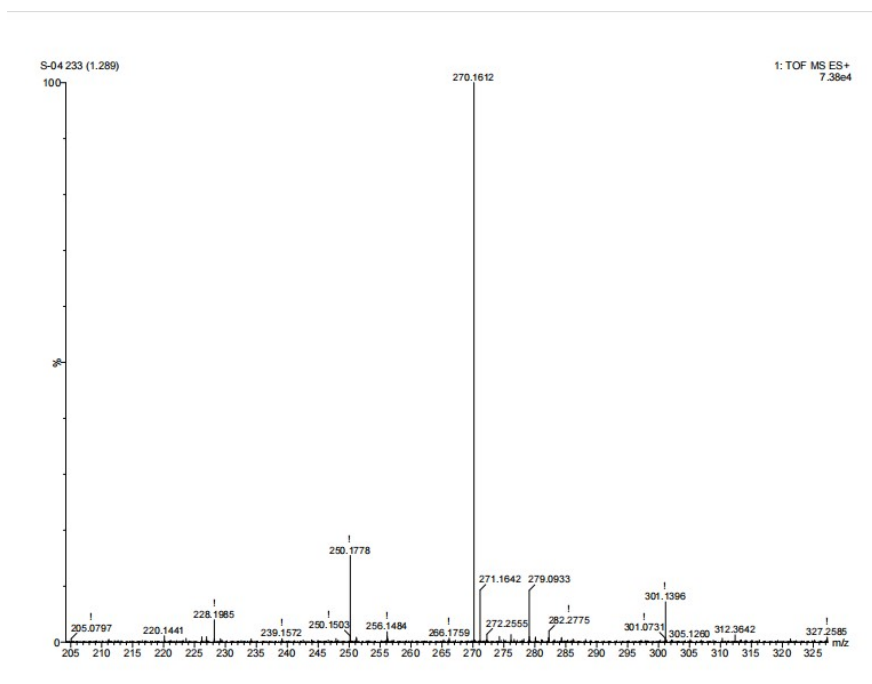

Fig. S36 Mass Spectrum of L4

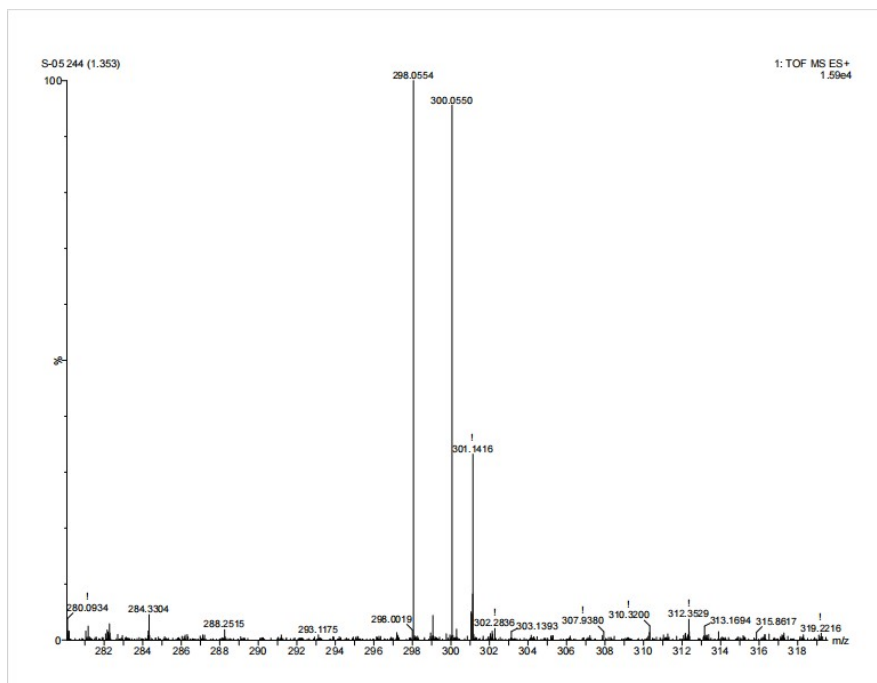

**Fig. S37** Mass Spectrum of L5

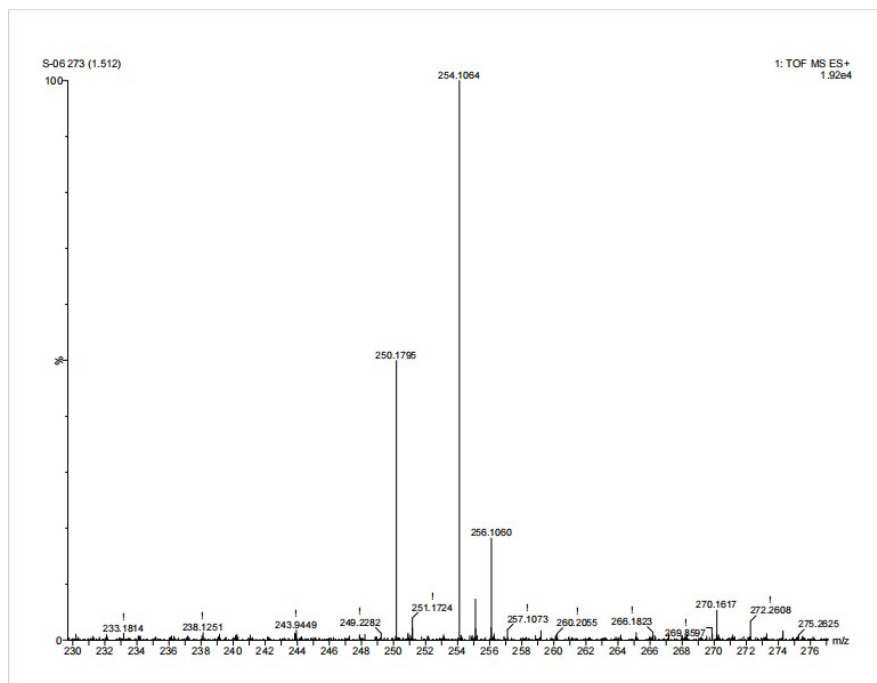

**Fig. S38** Mass Spectrum of L6

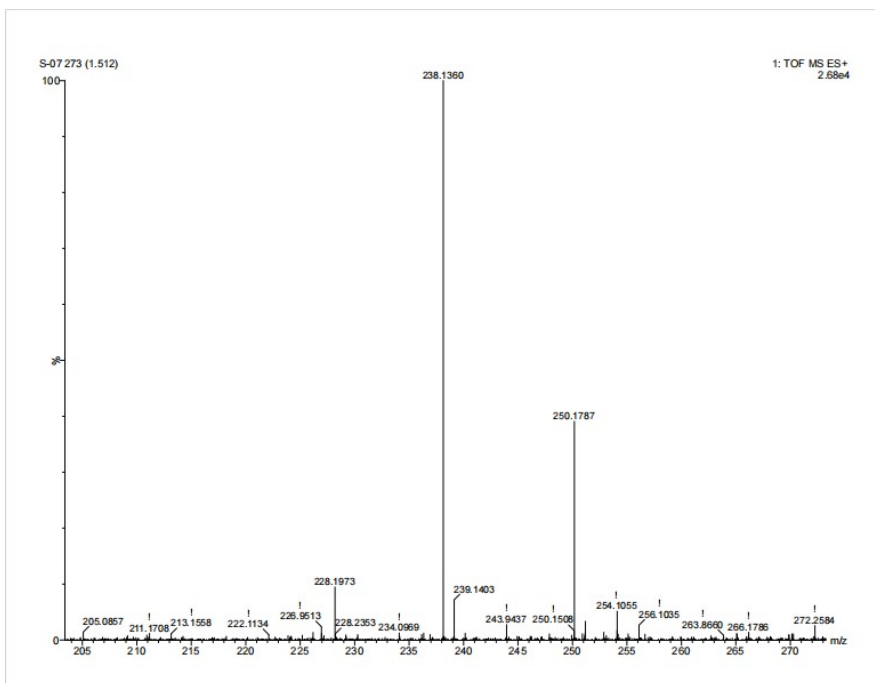

Fig. S39 Mass Spectrum of L7

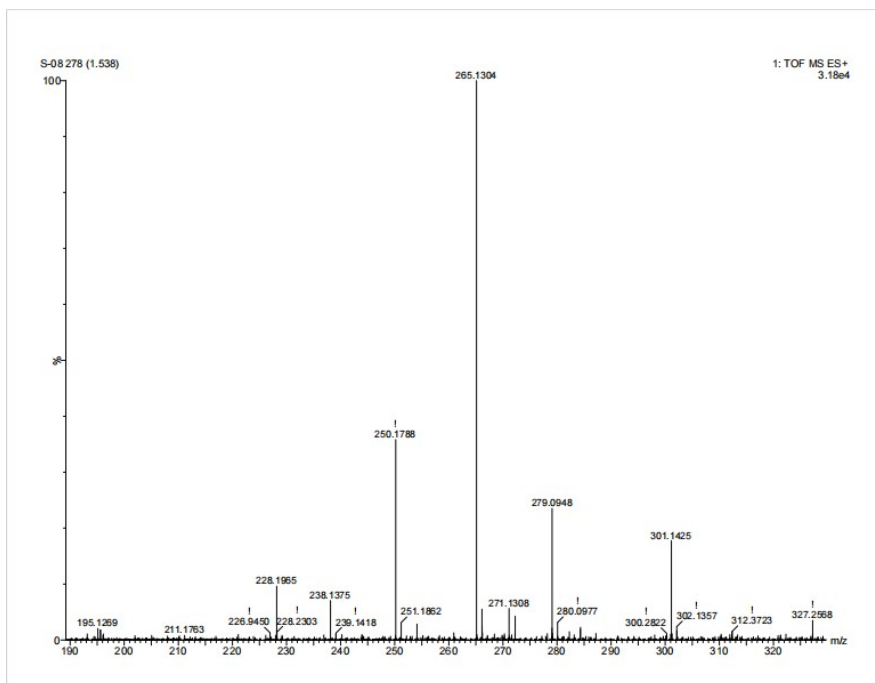

Fig. S40 Mass Spectrum of L8

## Mass spectra of all platinum complexes (C1-C8)

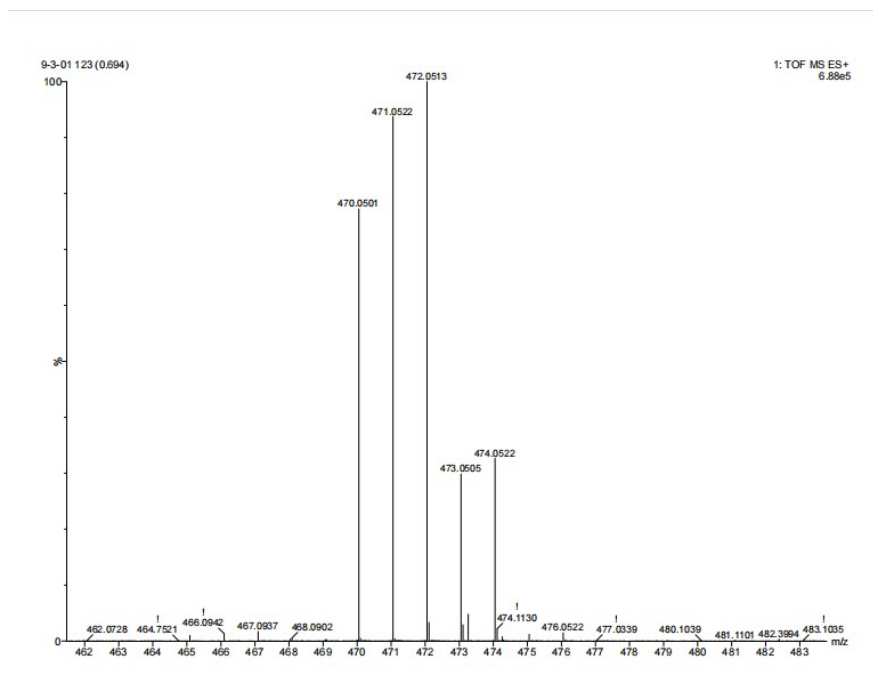

Fig. S41 Mass Spectrum of C1

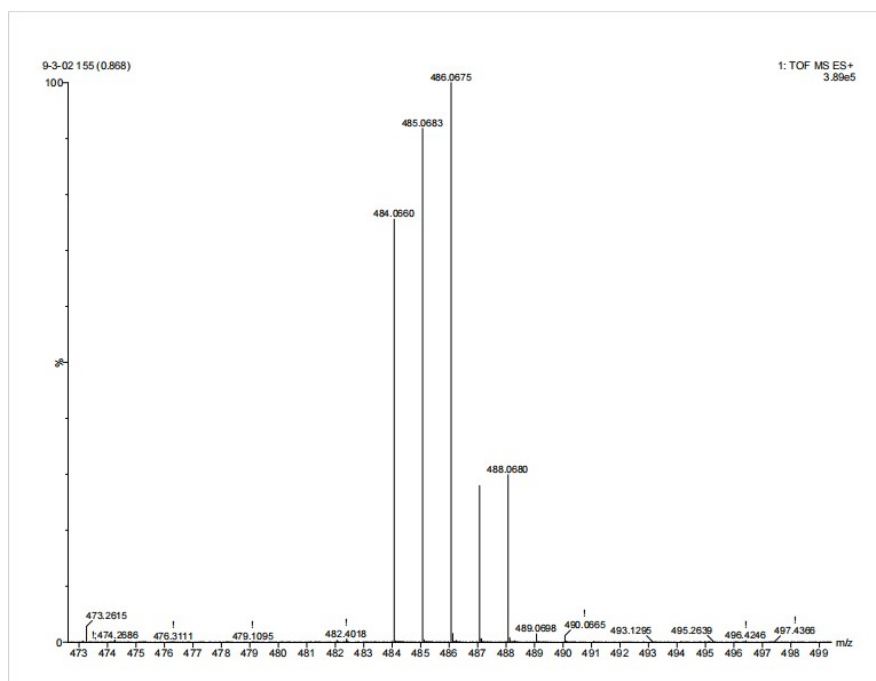

Fig. S42 Mass Spectrum of C2

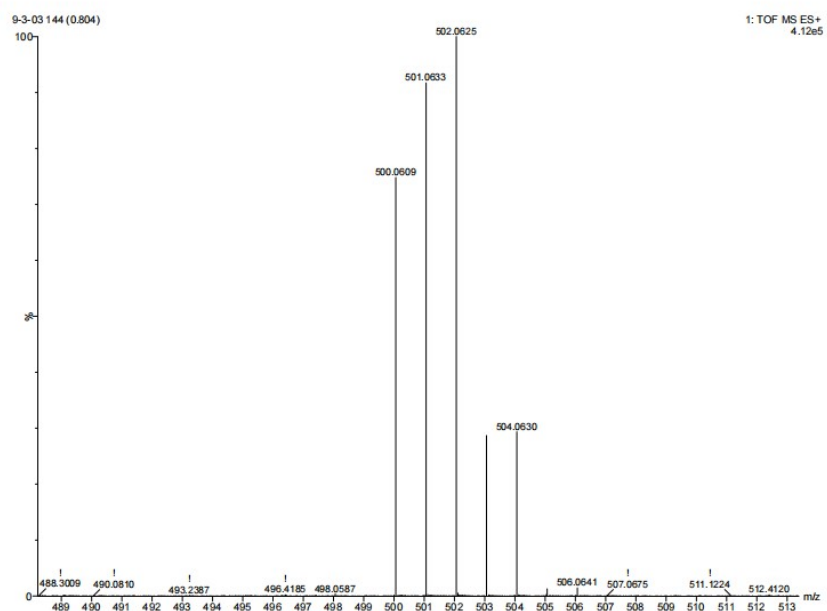

Fig. S43 Mass Spectrum of C3

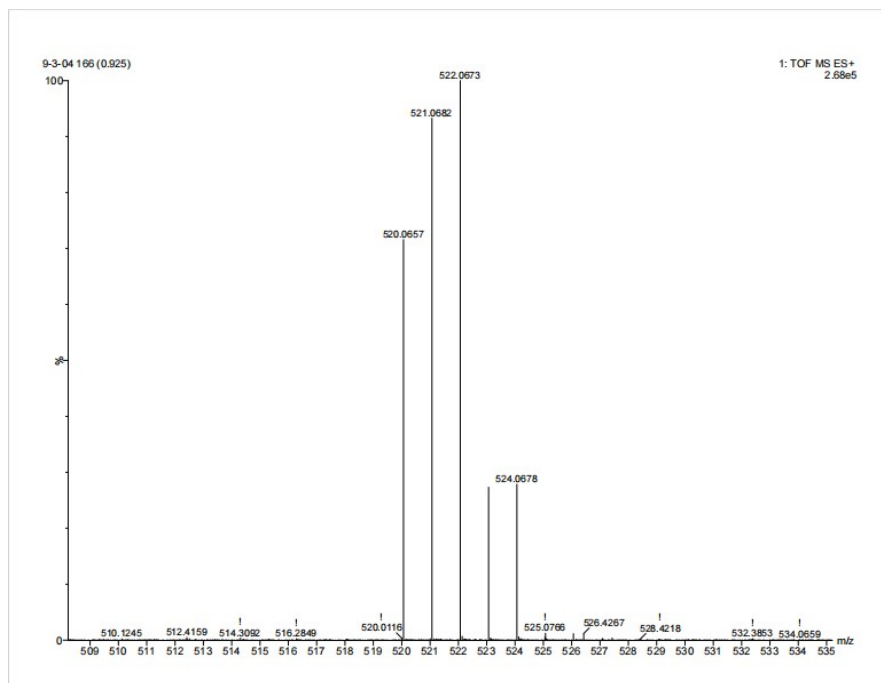

Fig. S44 Mass Spectrum of C4

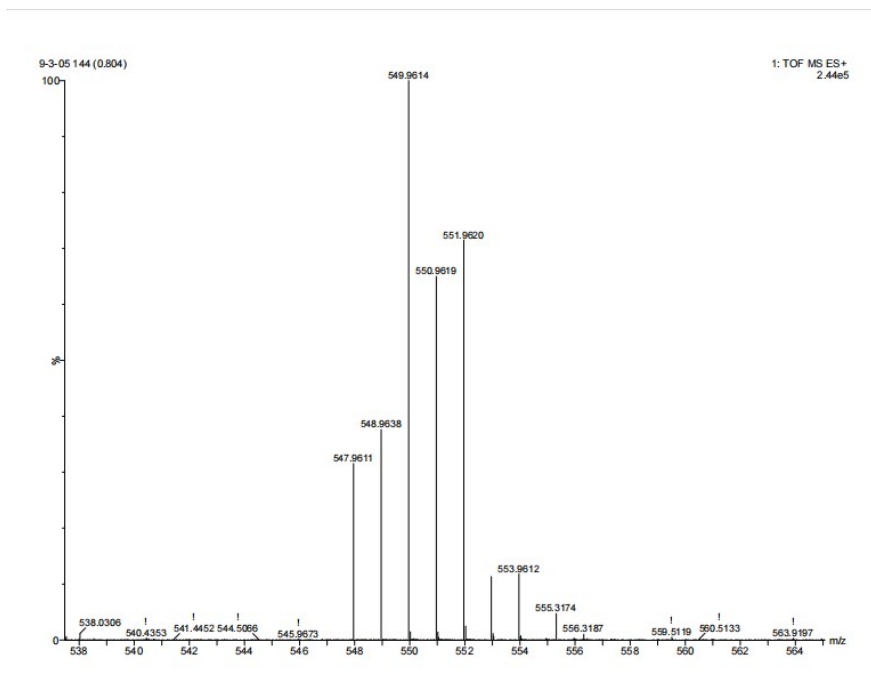

Fig. S45 Mass Spectrum of C5

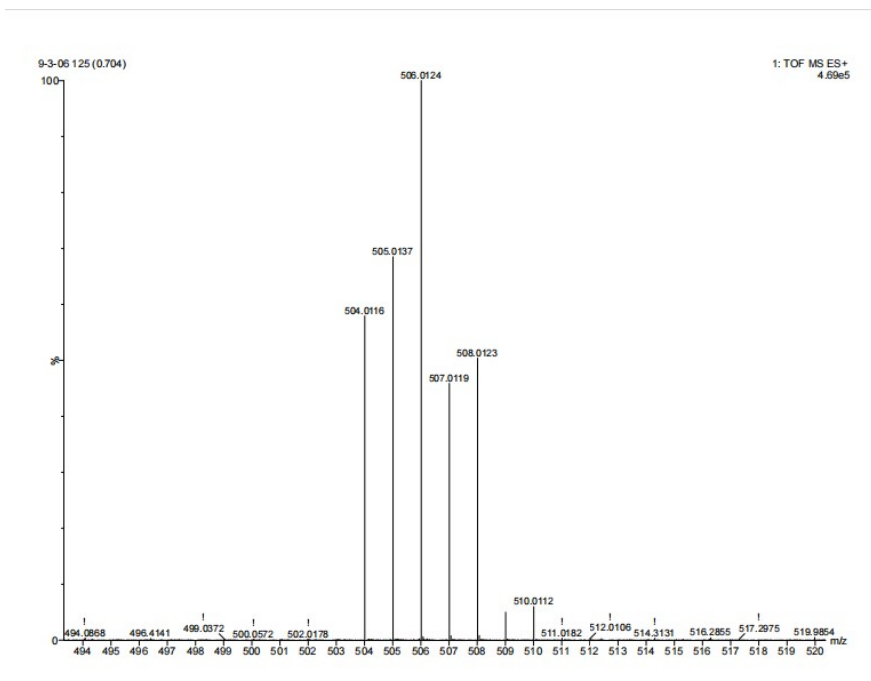

Fig. S46 Mass Spectrum of C6



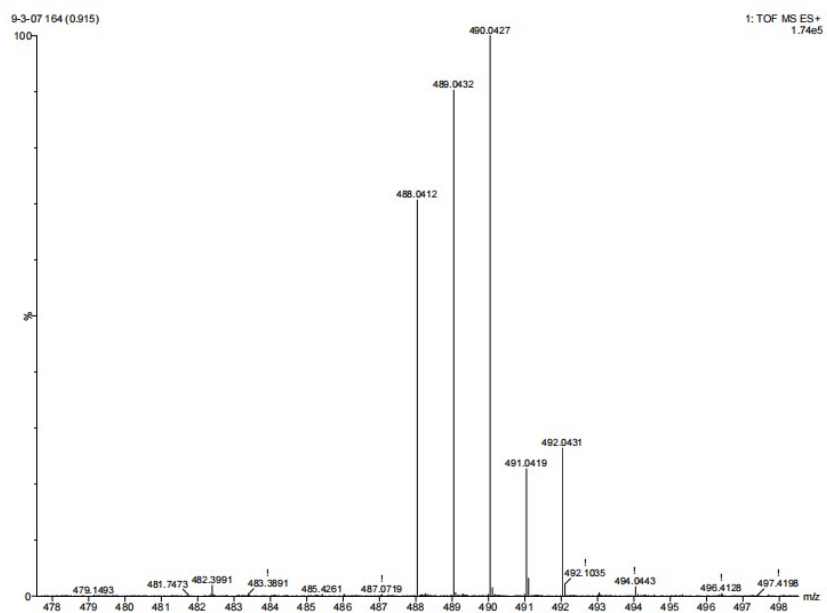

Fig. S47 Mass Spectrum of C7

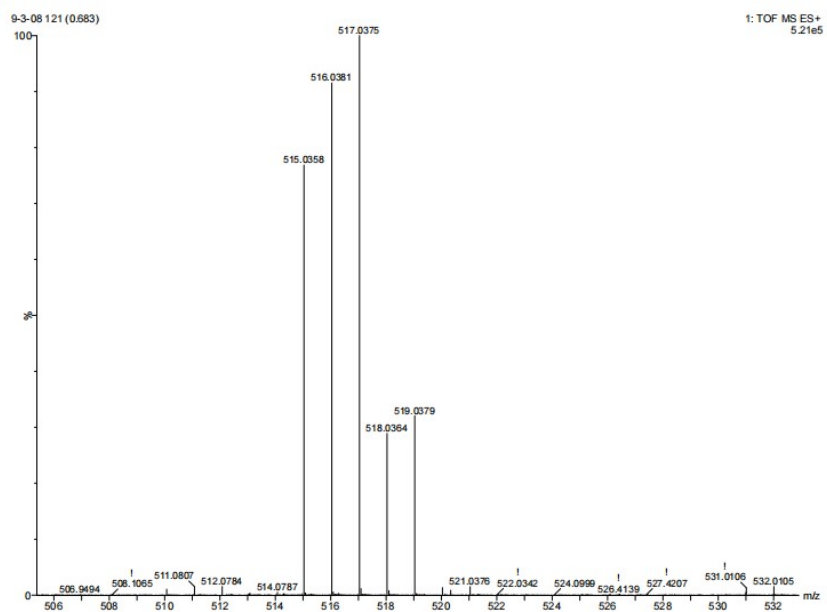

Fig. S48 Mass Spectrum of C8

## FT-IR Spectra of L1-L8 and L1-L8 and C1-C8

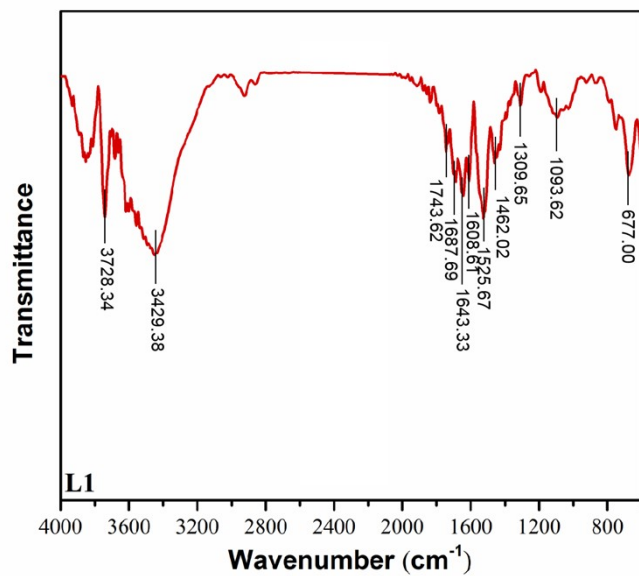

Fig. S49 FT-IR Spectrum of L1

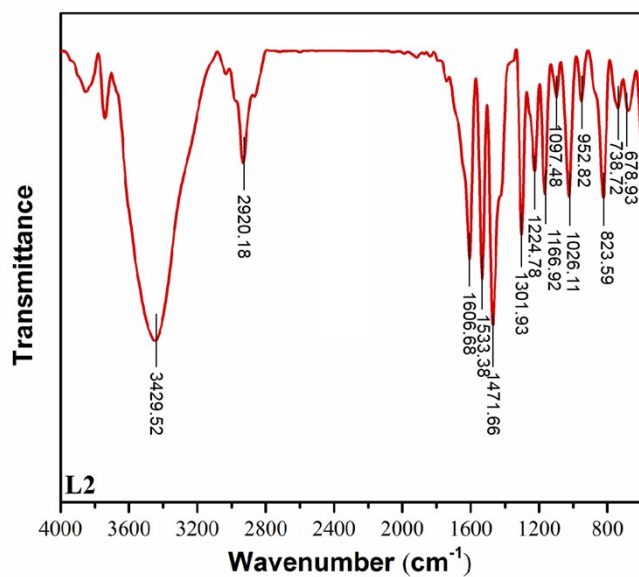

Fig. S50 FT-IR Spectrum of L2

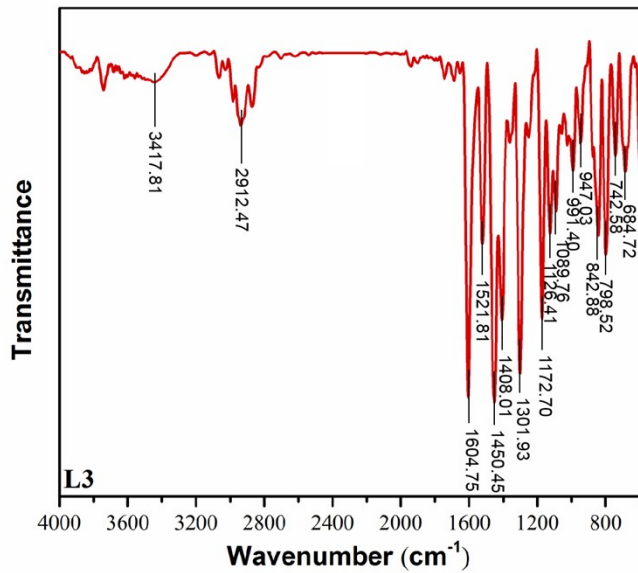

Fig. S51 FT-IR Spectrum of L3

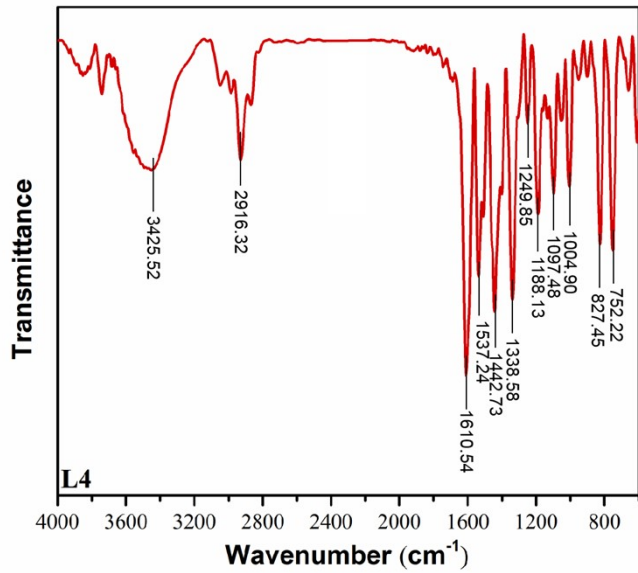

Fig. S52 FT-IR Spectrum of L4

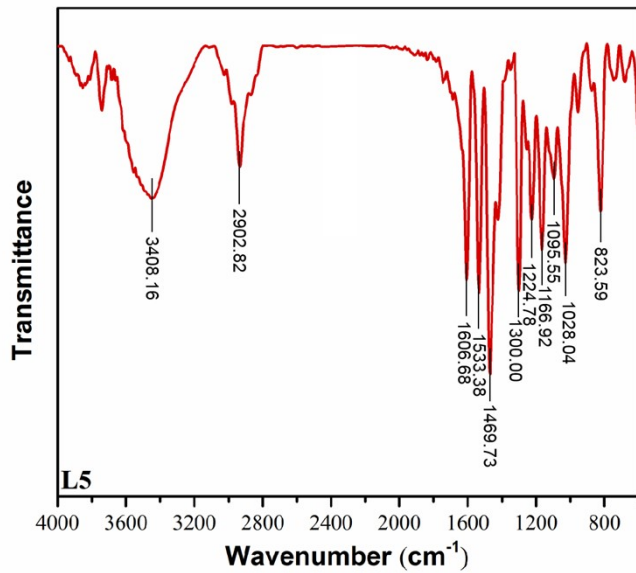

Fig. S53 FT-IR Spectrum of L5

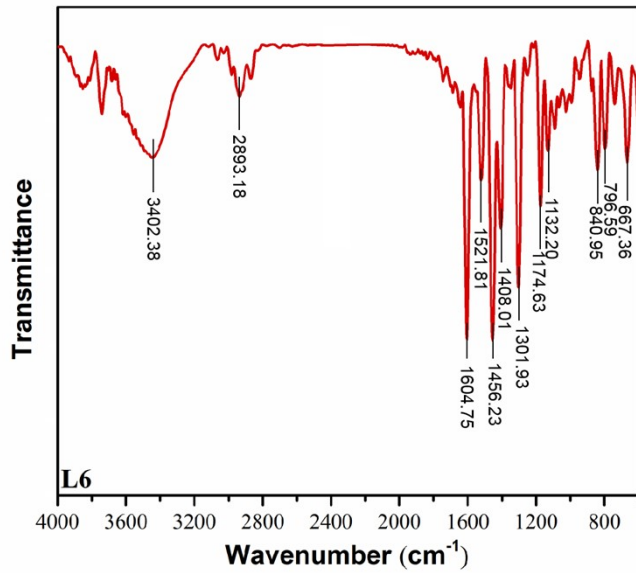

Fig. S54 FT-IR Spectrum of L6

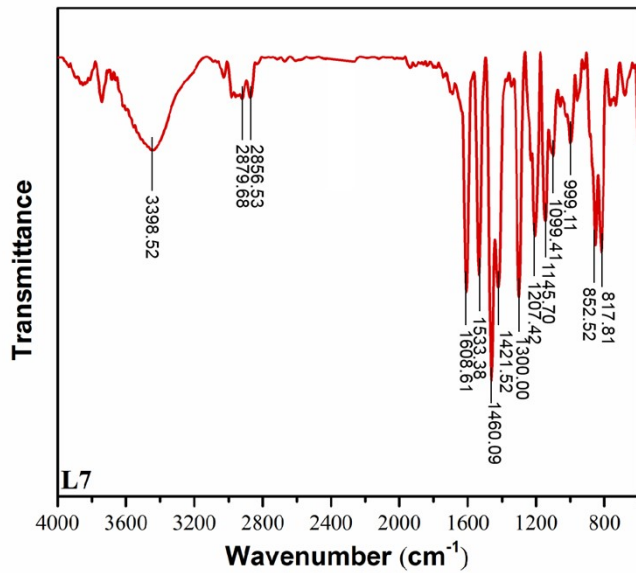

Fig. S55 FT-IR Spectrum of L7

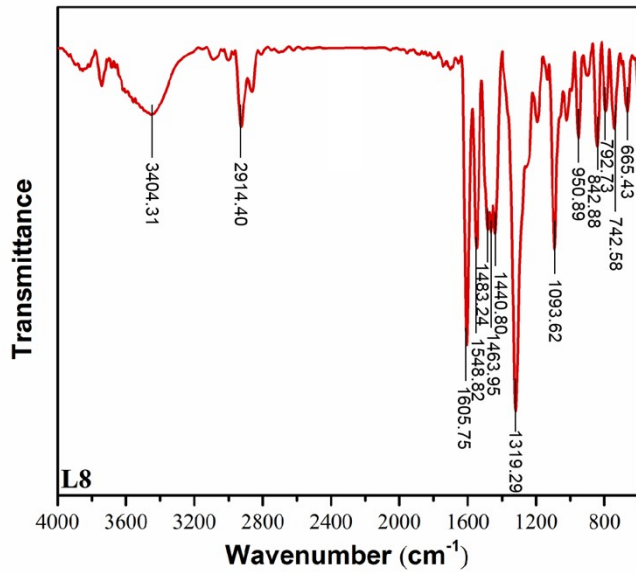

Fig. S56 FT-IR Spectrum of L8

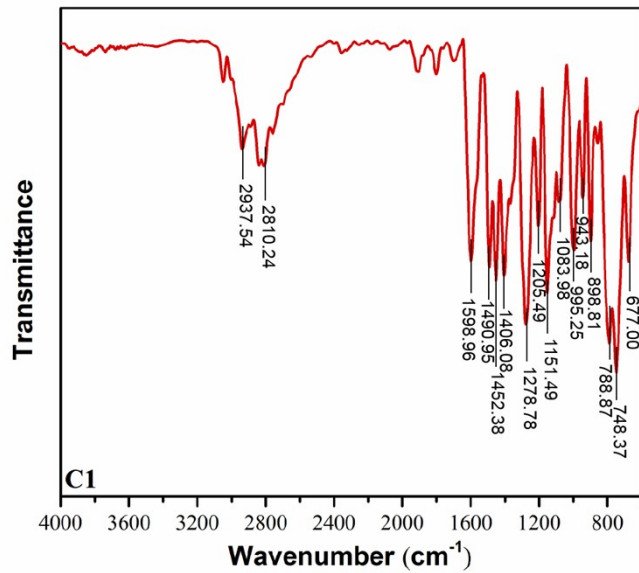

Fig. S57 FT-IR Spectrum of C1

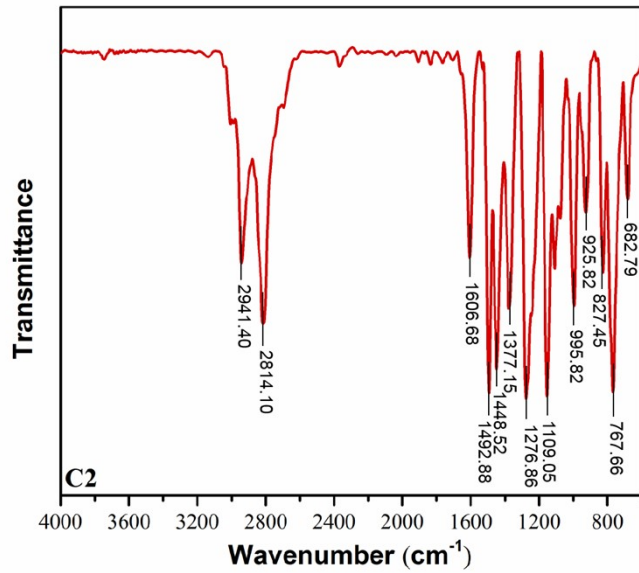

Fig. S58 FT-IR Spectrum of C2

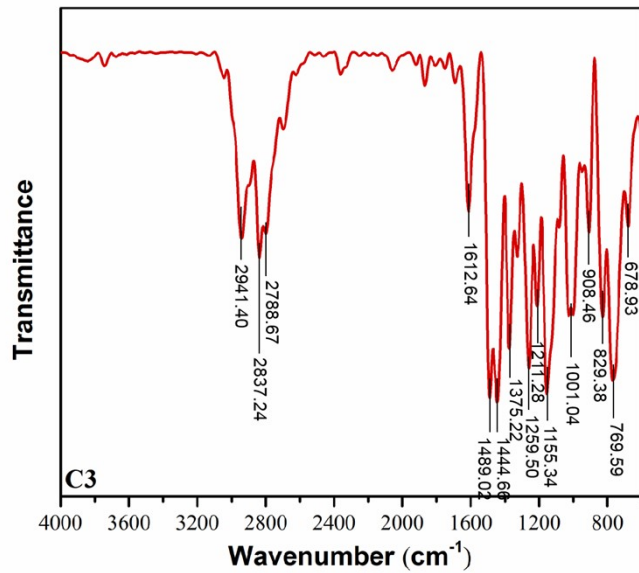

Fig. S59 FT-IR Spectrum of C3

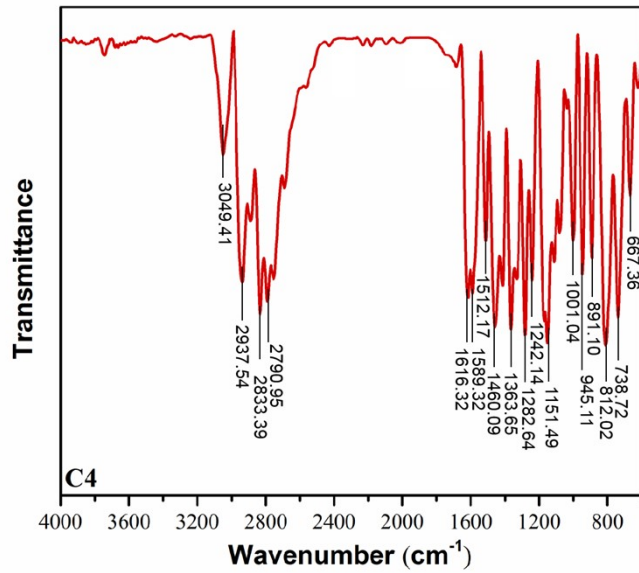

Fig. S60 FT-IR Spectrum of C4

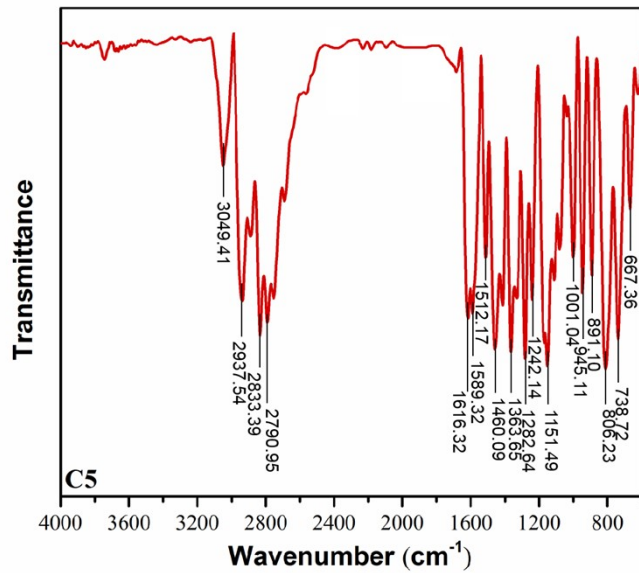

Fig. S61 FT-IR Spectrum of C5

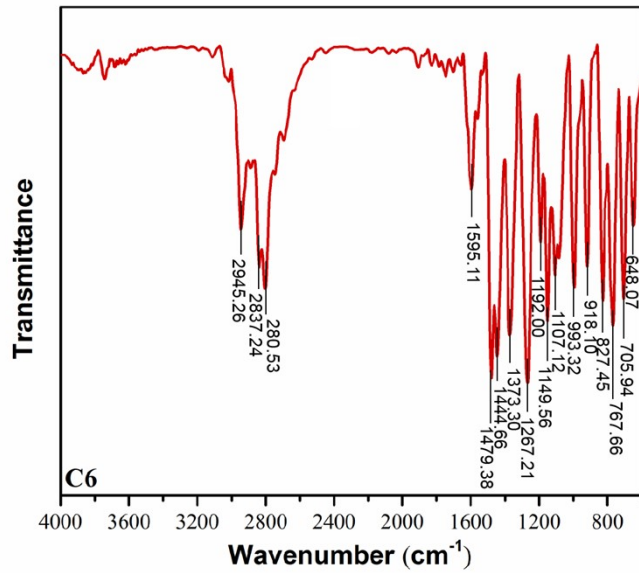

Fig. S62 FT-IR Spectrum of C6



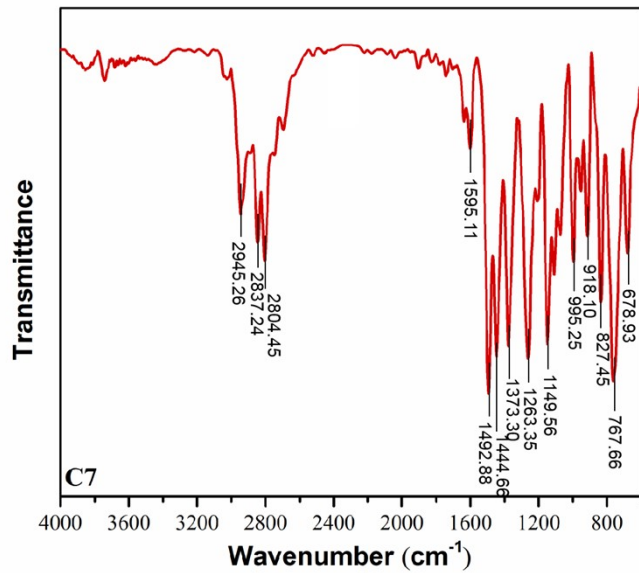

Fig. S63 FT-IR Spectrum of C7

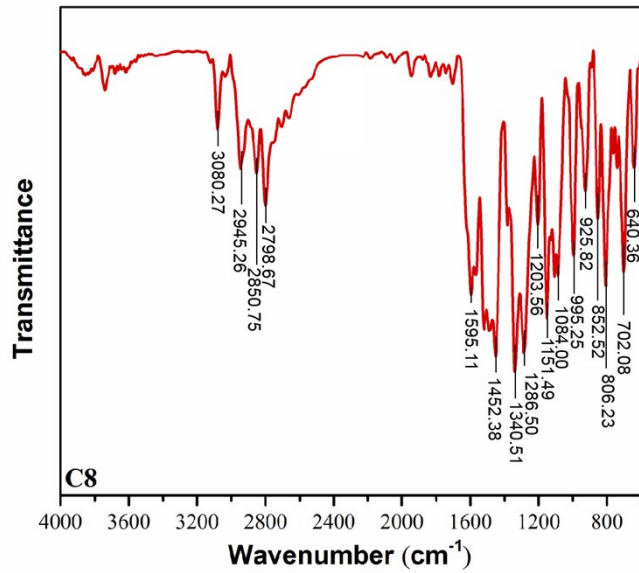

Fig. S64 FT-IR Spectrum of C8

## Stability analysis of C3, C4, C5 and C6

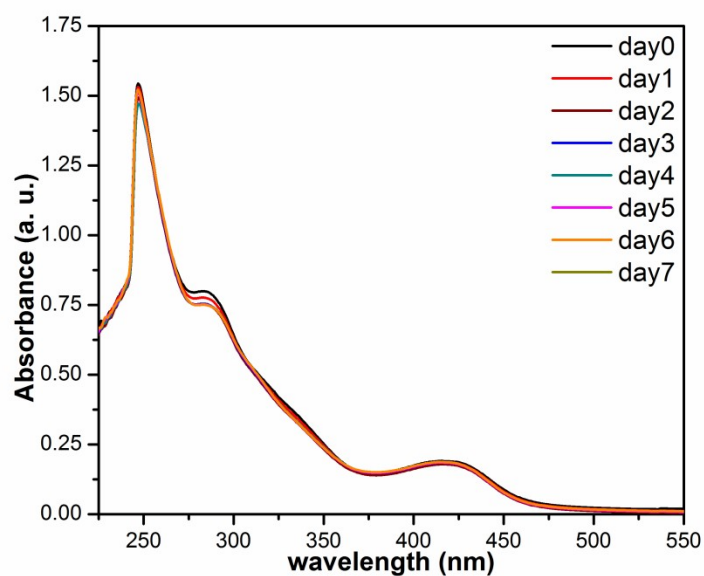

Fig. S65 UV-vis spectra of the stability analyses of C3 in DMSO:H<sub>2</sub>O=1:1, over the mentioned time points

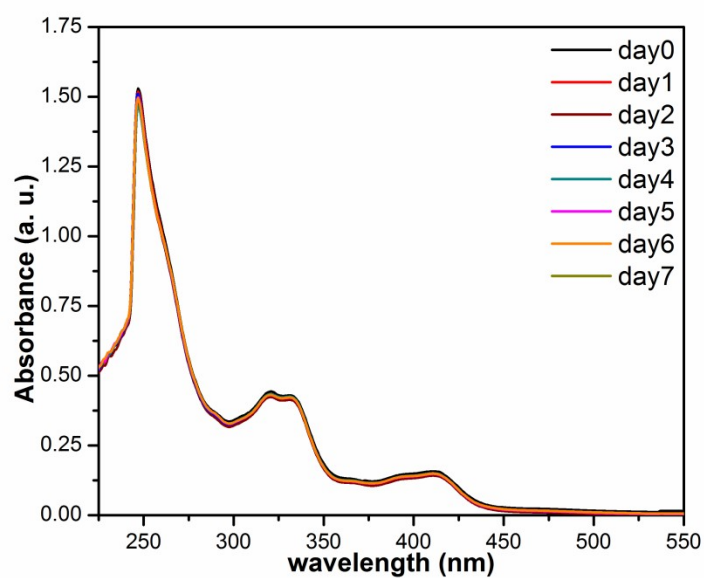

Fig. S66 UV-vis spectra of the stability analyses of C4 in DMSO:H<sub>2</sub>O=1:1, over the mentioned time points

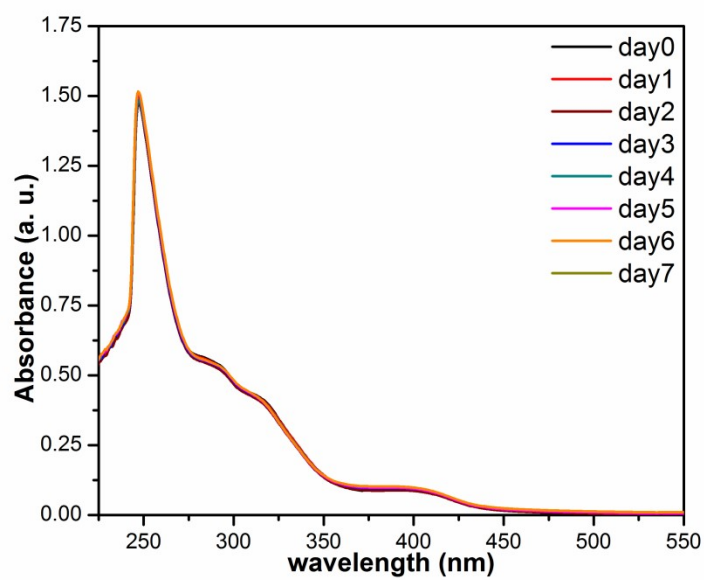

**Fig. S67** UV-vis spectra of the stability analyses of C5 in DMSO:H<sub>2</sub>O=1:1, over the mentioned time points

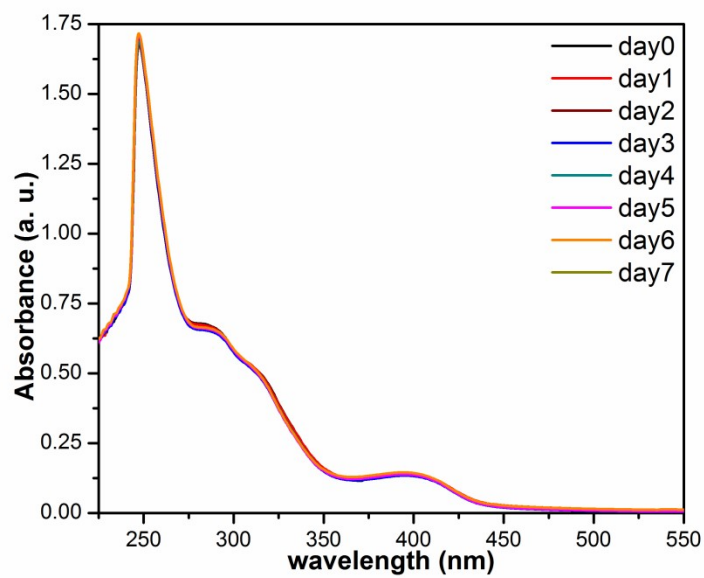

**Fig. S68** UV-vis spectra of the stability analyses of C6 in DMSO:H<sub>2</sub>O=1:1, over the mentioned time points

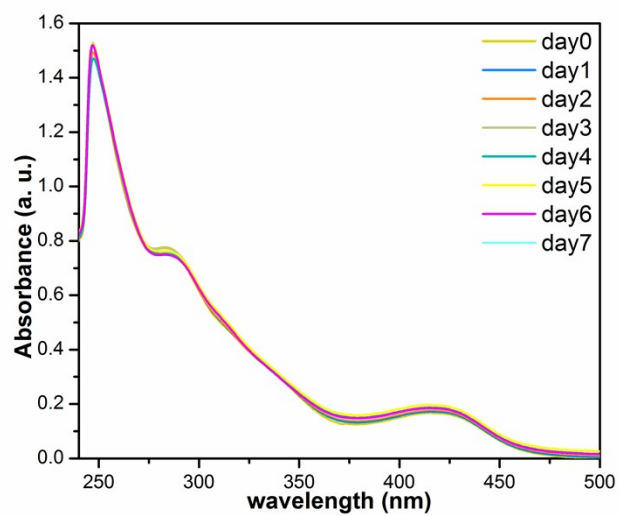

**Fig. S69** UV-vis spectra of the stability analyses of C3 in DMSO:PBS=1:1, over the mentioned time points

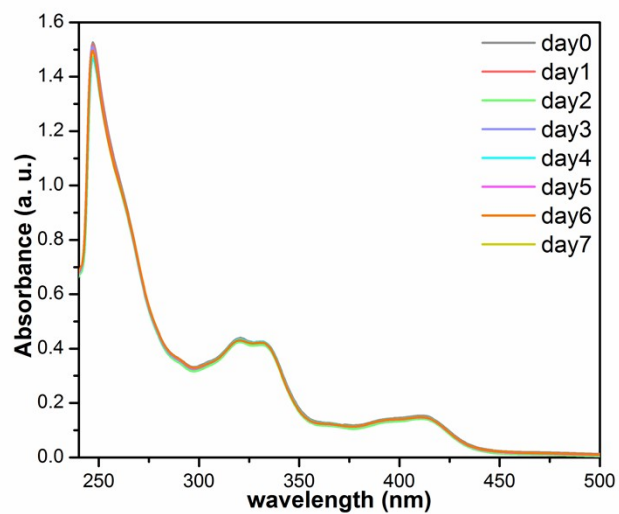

**Fig. S70** UV-vis spectra of the stability analyses of C4 in DMSO:PBS=1:1, over the mentioned time points

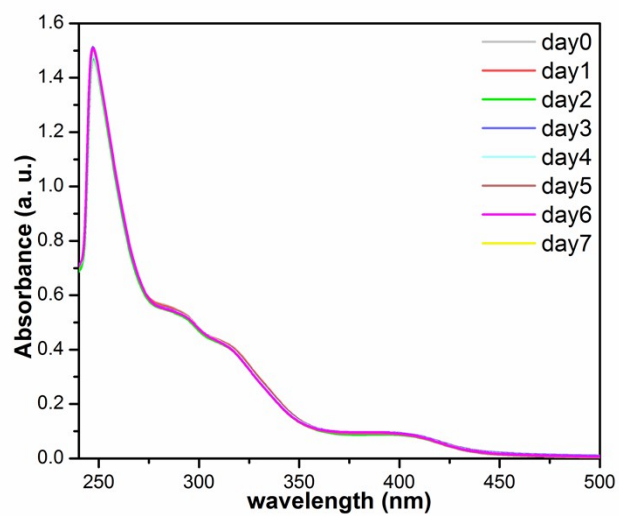

**Fig. S71** UV-vis spectra of the stability analyses of C5 in DMSO:PBS=1:1, over the mentioned time points

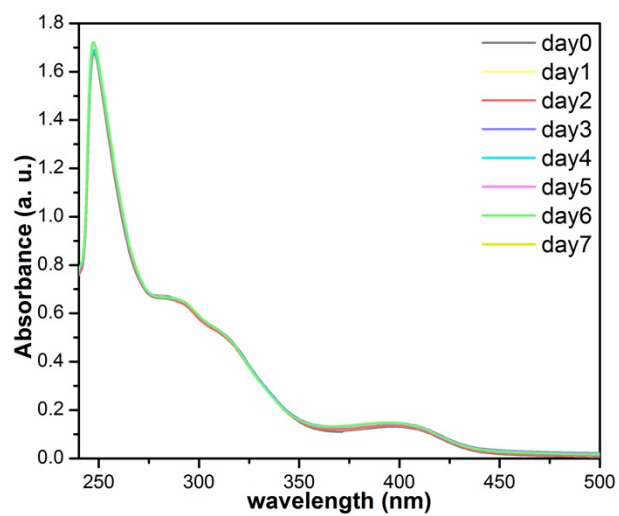

**Fig. S72** UV-vis spectra of the stability analyses of C6 in DMSO:PBS=1:1, over the mentioned time points
